# Supplementary material for: Genome-Guided Discovery of the First Myxobacterial Biarylitide Myxarylin Reveals Distinct C–N Biaryl Crosslinking in RiPP Biosynthesis
Source: MDPI journal article supplement (doi:10.3390/molecules26247483), 2021-12-10
Supplement: s1 [file s1]

## Supporting Information

# Genome-guided discovery of the first myxobacterial Biarylptide Myxarylin reveals C–N biaryl crosslinking in RiPP biosynthesis

Joachim J. Hug <sup>1,2,†</sup>, Nicolas A. Frank <sup>1,2,†</sup>, Christine Walt <sup>1,2</sup>, Petra Šenica <sup>1,2</sup>,  
Fabian Panter <sup>1,2,3</sup> and Rolf Müller <sup>1,2,3,\*</sup>

- 1     Helmholtz-Institute for Pharmaceutical Research Saarland (HIPS), Helmholtz Centre for Infection Research (HZI), Saarland University, Campus E8 1, 66123 Saarbrücken, Germany;  
Joachim.Hug@helmholtz-hips.de (J.J.H.); Nicolas.Frank@helmholtz-hips.de (N.A.F.); Christine.Walt@helmholtz-hips.de (C.W.); Petra.Senica1@gmail.com (P.Š.); Fabian.Panter@gmail.com (F.P.)
- 2     German Center for Infection Research (DZIF), Partner Site Hannover-Braunschweig, Germany
- 3     Helmholtz International Labs, Campus E8 1, 66123 Saarbrücken, Germany
- \*     Correspondence: rolf.mueller@helmholtz-hips.de
- †     These authors contributed equally to this work.

**Table of Contents**

|       |                                                                                       |    |
|-------|---------------------------------------------------------------------------------------|----|
| 1     | Myxobacterial culture media .....                                                     | 3  |
| 2     | Molecular cloning, construction of expression plasmids and genetic investigation..... | 6  |
| 2.1   | Genetic investigations .....                                                          | 7  |
| 2.2   | Heterologous production of Myxarylin in <i>M. xanthus</i> DK1622 .....                | 8  |
| 3     | Compound Characterization .....                                                       | 11 |
| 3.1   | Tandem MS spectra.....                                                                | 11 |
| 3.2   | Structure elucidation.....                                                            | 12 |
| 3.2.1 | NMR-based structure elucidation.....                                                  | 12 |
| 3.2.2 | NMR spectra employed in Myxarylin structure elucidation .....                         | 15 |
| 3.2.3 | Elucidation of the absolute stereochemistry .....                                     | 28 |
| 4     | References .....                                                                      | 34 |

# 1 Myxobacterial culture media

**Table S1.** Recipe for VY/2 medium.

| VY/2 – Medium                                               |                                                        |               |                                                 |
|-------------------------------------------------------------|--------------------------------------------------------|---------------|-------------------------------------------------|
| Amount                                                      | Ingredient                                             | Concentration | Supplier                                        |
| 5 g/L                                                       | Yeast (entire cells)                                   | -             | Deutsche Hefewerke GmbH, Nürnberg, Germany      |
| 5 g/L                                                       | Soluble Starch                                         | -             | Carl Roth GmbH, Karlsruhe, Germany              |
| 1 g/L                                                       | CaCl <sub>2</sub> • 2H <sub>2</sub> O                  | -             | Sigma Aldrich Chemie GmbH, Taufkirchen, Germany |
| 1 g/L                                                       | MgSO <sub>4</sub> • 7H <sub>2</sub> O                  | -             | Grüssing GmbH, Filsum, Germany                  |
| 10 mL/L                                                     | TRIS • HCl pH 8                                        | 1 M           | Sigma Aldrich Chemie GmbH, Taufkirchen, Germany |
| 100 µL/L                                                    | Sterile Vit. B12 solution<br>(added after autoclaving) | 1 mg/mL       | Carl Roth GmbH, Karlsruhe, Germany              |
| 200 µL/L                                                    | Sterile FeNaEDTA solution<br>(added after autoclaving) | 8 mg/mL       | Sigma Aldrich Chemie GmbH, Taufkirchen, Germany |
| Dissolved in milli-Q. Water, pH adjusted to 7.2 with 1N HCl |                                                        |               |                                                 |

**Table S2.** Recipe for VY medium.

| VY – Medium                                                 |                                                        |               |                                                 |
|-------------------------------------------------------------|--------------------------------------------------------|---------------|-------------------------------------------------|
| Amount                                                      | Ingredient                                             | Concentration | Supplier                                        |
| 10 g/L                                                      | Yeast (entire cells)                                   | -             | Deutsche Hefewerke GmbH, Nürnberg, Germany      |
| 5 g/L                                                       | Soluble Starch                                         | -             | Carl Roth GmbH, Karlsruhe, Germany              |
| 1 g/L                                                       | CaCl <sub>2</sub> • 2H <sub>2</sub> O                  | -             | Sigma Aldrich Chemie GmbH, Taufkirchen, Germany |
| 1 g/L                                                       | MgSO <sub>4</sub> • 7H <sub>2</sub> O                  | -             | Grüssing GmbH, Filsum, Germany                  |
| 10 mL/L                                                     | TRIS • HCl pH 8                                        | 1 M           | Sigma Aldrich Chemie GmbH, Taufkirchen, Germany |
| 100 µL/L                                                    | Sterile Vit. B12 solution<br>(added after autoclaving) | 1 mg/mL       | Carl Roth GmbH, Karlsruhe, Germany              |
| 200 µL/L                                                    | Sterile FeNaEDTA solution<br>(added after autoclaving) | 8 mg/mL       | Sigma Aldrich Chemie GmbH, Taufkirchen, Germany |
| Dissolved in milli-Q. Water, pH adjusted to 7.2 with 1N HCl |                                                        |               |                                                 |

**Table S3.** Recipe for CFL medium.

| CFL – Medium                                                |                                                        |               |                                                 |
|-------------------------------------------------------------|--------------------------------------------------------|---------------|-------------------------------------------------|
| Amount                                                      | Ingredient                                             | Concentration | Supplier                                        |
| 3 g/L                                                       | Tryptone                                               | -             | Becton, Dickinson and Company, Sparks, MD, USA  |
| 1 g/L                                                       | Soytone                                                | -             | Becton, Dickinson and Company, Sparks, MD, USA  |
| 3.5 g/L                                                     | Soluble Starch                                         | -             | Carl Roth GmbH, Karlsruhe, Germany              |
| 4 g/L                                                       | Maltose Monohydrate                                    | -             | Sigma Aldrich Chemie GmbH, Taufkirchen, Germany |
| 2 g/L                                                       | Glucose                                                | -             | Carl Roth GmbH, Karlsruhe, Germany              |
| 0.5 g/L                                                     | CaCl <sub>2</sub> • 2H <sub>2</sub> O                  | -             | Sigma Aldrich Chemie GmbH, Taufkirchen, Germany |
| 1 g/L                                                       | MgSO <sub>4</sub> • 7H <sub>2</sub> O                  | -             | Grüssing GmbH, Filsum, Germany                  |
| 10 mL/L                                                     | TRIS • HCl pH 8                                        | 1 M           | Sigma Aldrich Chemie GmbH, Taufkirchen, Germany |
| 100 µL/L                                                    | Sterile Vit. B12 solution<br>(added after autoclaving) | 1 mg/mL       | Carl Roth GmbH, Karlsruhe, Germany              |
| 200 µL/L                                                    | Sterile FeNaEDTA solution<br>(added after autoclaving) | 8 mg/mL       | Sigma Aldrich Chemie GmbH, Taufkirchen, Germany |
| Dissolved in milli-Q. Water, pH adjusted to 7.5 with 1N KOH |                                                        |               |                                                 |

**Table S4.** Recipe for P medium.

| P – Medium                                                  |                                                        |               |                                                 |
|-------------------------------------------------------------|--------------------------------------------------------|---------------|-------------------------------------------------|
| Amount                                                      | Ingredient                                             | Concentration | Supplier                                        |
| 2 g/L                                                       | Peptone (Phytone)                                      | -             | Becton, Dickinson and Company, Sparks, MD, USA  |
| 4 g/L                                                       | Procion FM582                                          | -             | Hoechst GmbH, Frankfurt, Germany                |
| 8 g/L                                                       | Soluble Starch                                         | -             | Carl Roth GmbH, Karlsruhe, Germany              |
| 2 g/L                                                       | Glucose                                                | -             | Carl Roth GmbH, Karlsruhe, Germany              |
| 1 g/L                                                       | CaCl <sub>2</sub> • 2H <sub>2</sub> O                  | -             | Sigma Aldrich Chemie GmbH, Taufkirchen, Germany |
| 1 g/L                                                       | MgSO <sub>4</sub> • 7H <sub>2</sub> O                  | -             | Grüssing GmbH, Filsum, Germany                  |
| 10 mL/L                                                     | TRIS • HCl pH 8                                        | 1 M           | Sigma Aldrich Chemie GmbH, Taufkirchen, Germany |
| 100 µL/L                                                    | Sterile Vit. B12 solution<br>(added after autoclaving) | 1 mg/mL       | Carl Roth GmbH, Karlsruhe, Germany              |
| 200 µL/L                                                    | Sterile FeNaEDTA solution<br>(added after autoclaving) | 8 mg/mL       | Sigma Aldrich Chemie GmbH, Taufkirchen, Germany |
| Dissolved in milli-Q. Water, pH adjusted to 7.5 with 1N KOH |                                                        |               |                                                 |

**Table S5.** Recipe for M medium.

| M – Medium                                                  |                                                        |               |                                                 |
|-------------------------------------------------------------|--------------------------------------------------------|---------------|-------------------------------------------------|
| Amount                                                      | Ingredient                                             | Concentration | Supplier                                        |
| 10 g/L                                                      | Soy Peptone                                            | -             | Becton, Dickinson and Company, Sparks, MD, USA  |
| 10 g/L                                                      | Maltose monohydrate                                    | -             | Becton, Dickinson and Company, Sparks, MD, USA  |
| 1 g/L                                                       | CaCl <sub>2</sub> • 2H <sub>2</sub> O                  | -             | Sigma Aldrich Chemie GmbH, Taufkirchen, Germany |
| 1 g/L                                                       | MgSO <sub>4</sub> • 7H <sub>2</sub> O                  | -             | Grüssing GmbH, Filsum, Germany                  |
| 10 mL/L                                                     | TRIS • HCl pH 8                                        | 1 M           | Sigma Aldrich Chemie GmbH, Taufkirchen, Germany |
| 100 µL/L                                                    | Sterile Vit. B12 solution<br>(added after autoclaving) | 1 mg/mL       | Carl Roth GmbH, Karlsruhe, Germany              |
| 200 µL/L                                                    | Sterile FeNaEDTA solution<br>(added after autoclaving) | 8 mg/mL       | Sigma Aldrich Chemie GmbH, Taufkirchen, Germany |
| Dissolved in milli-Q. Water, pH adjusted to 7.5 with 1N KOH |                                                        |               |                                                 |

**Table S6.** Recipe for YM medium.

| YM – Medium                                                 |                                                             |               |                                                 |
|-------------------------------------------------------------|-------------------------------------------------------------|---------------|-------------------------------------------------|
| Amount                                                      | Ingredient                                                  | Concentration | Supplier                                        |
| 3 g/L                                                       | Yeast extract                                               | -             | Becton, Dickinson and Company, Sparks, MD, USA  |
| 3 g/L                                                       | Malt extract                                                | -             | Becton, Dickinson and Company, Sparks, MD, USA  |
| 5 g/L                                                       | Peptone (Phytone)                                           | -             | Becton, Dickinson and Company, Sparks, MD, USA  |
| 10 g/L                                                      | Glucose                                                     | -             | Carl Roth GmbH, Karlsruhe, Germany              |
| 1 mL/L                                                      | K <sub>2</sub> H <sub>2</sub> PO <sub>4</sub> buffer pH 8.0 | 0.8 M         | Sigma Aldrich Chemie GmbH, Taufkirchen, Germany |
| 1 g/L                                                       | MgSO <sub>4</sub> • 7H <sub>2</sub> O                       | -             | Grüssing GmbH, Filsum, Germany                  |
| 10 mL/L                                                     | TRIS • HCl pH 8                                             | 1 M           | Sigma Aldrich Chemie GmbH, Taufkirchen, Germany |
| 100 µL/L                                                    | Sterile Vit. B12 solution<br>(added after autoclaving)      | 1 mg/mL       | Carl Roth GmbH, Karlsruhe, Germany              |
| 200 µL/L                                                    | Sterile FeNaEDTA solution<br>(added after autoclaving)      | 8 mg/mL       | Sigma Aldrich Chemie GmbH, Taufkirchen, Germany |
| Dissolved in milli-Q. Water, pH adjusted to 7.5 with 1N KOH |                                                             |               |                                                 |

**Table S7.** Recipe for CTT medium.

| CTT – Medium                                                |                                                             |               |                                                 |
|-------------------------------------------------------------|-------------------------------------------------------------|---------------|-------------------------------------------------|
| Amount                                                      | Ingredient                                                  | Concentration | Supplier                                        |
| 10 g/L                                                      | Casitone                                                    | -             | Becton, Dickinson and Company, Sparks, MD, USA  |
| 10 mL/L                                                     | MgSO <sub>4</sub> • 7H <sub>2</sub> O                       | 0.8 M         | Grüssing GmbH, Filsum, Germany                  |
| 1 mL/L                                                      | K <sub>x</sub> H <sub>y</sub> PO <sub>4</sub> buffer pH 8.0 | 0.1 M         | Sigma Aldrich Chemie GmbH, Taufkirchen, Germany |
| 10 mL/L                                                     | TRIS • HCl pH8                                              | 1 M           | Sigma Aldrich Chemie GmbH, Taufkirchen, Germany |
| 100 µL/L                                                    | Sterile Vit. B12 solution<br>(added after autoclaving)      | 1 mg/mL       | Carl Roth GmbH, Karlsruhe, Germany              |
| 200 µL/L                                                    | Sterile FeNaEDTA solution<br>(added after autoclaving)      | 8 mg/mL       | Sigma Aldrich Chemie GmbH, Taufkirchen, Germany |
| Dissolved in milli-Q. Water, pH adjusted to 7.6 with 1N KOH |                                                             |               |                                                 |

**Table S8.** Recipe for AMB medium.

| AMB– Medium                                                 |                                                             |               |                                                 |
|-------------------------------------------------------------|-------------------------------------------------------------|---------------|-------------------------------------------------|
| Amount                                                      | Ingredient                                                  | Concentration | Supplier                                        |
| 2.5 g/L                                                     | Casitone                                                    | -             | Becton, Dickinson and Company, Sparks, MD, USA  |
| 5 g/L                                                       | Soluble starch                                              | -             | Carl Roth GmbH, Karlsruhe, Germany              |
| 10 mL/L                                                     | MgSO <sub>4</sub> • 7H <sub>2</sub> O                       | 0.8 M         | Grüssing GmbH, Filsum, Germany                  |
| 1 mL/L                                                      | K <sub>x</sub> H <sub>y</sub> PO <sub>4</sub> buffer pH 8.0 | 0.1 M         | Sigma Aldrich Chemie GmbH, Taufkirchen, Germany |
| 10 mL/L                                                     | TRIS • HCl pH 8.0                                           | 1 M           | Sigma Aldrich Chemie GmbH, Taufkirchen, Germany |
| 100 µL/L                                                    | Sterile Vit. B12 solution<br>(added after autoclaving)      | 1 mg/mL       | Carl Roth GmbH, Karlsruhe, Germany              |
| 200 µL/L                                                    | Sterile FeNaEDTA solution<br>(added after autoclaving)      | 8 mg/mL       | Sigma Aldrich Chemie GmbH, Taufkirchen, Germany |
| Dissolved in milli-Q. Water, pH adjusted to 7.6 with 1N KOH |                                                             |               |                                                 |

## 2 Molecular cloning, construction of expression plasmids and genetic investigation

**Table S9.** List of oligonucleotides used in this study.

| No. | Primer name     | Primer sequence 5'–3'                                |
|-----|-----------------|------------------------------------------------------|
| 1   | Fw_mx8_PagI     | ATAT <b>T</b> CATGAGGCCATCGTCGAAAGAGTCG              |
| 2   | Rv_mx8_ScaI     | ATATAGTACTAGGACTCCTCTGGCTGGGTG                       |
| 3   | Fw_An_d48_NdeI  | ATATCATATGA <b>A</b> CTACCTGCACTGAGAGGAGCCTCCGTGCCCA |
| 4   | Rv_An_d48_EcoRI | TATATGA <b>A</b> TTTCGAGGCGGCGTAGCCCTCA              |
| 5   | Mx8-attP-up2    | CGACGGTGCCGACAAATAC                                  |
| 6   | Mx8-attB-up2    | GCGCACTGGACCATCACGTC                                 |
| 7   | Mx8-attP-down   | GGCTTGTGCCAGTCAACTGCG                                |
| 8   | Mx8-attB-down   | CGGATAGCTCAGCGGTAGAG                                 |

Restriction sites in bold, *bytA* and *bytO* start are underlined, RBS of *bytO* in yellow.

**Table S10.** List of oligonucleotides for sequencing used in this study.

| No. | Primer name            | Primer sequence 5'–3' |
|-----|------------------------|-----------------------|
| 1   | P <sub>van</sub> _Seq1 | TGTCAAGCTGCTGTTTTTCGC |
| 2   | M13-29R                | CAGGAAACAGCTATGACC    |
| 3   | BiarylSeq1             | GAGGCGGCGTAGCCCTCA    |
| 4   | BiarylSeq2             | GAGGAGCCTCCGTGCCCA    |

**Table S11.** List of PCR-amplified constructs.

| No. | PCR product name/characteristics | Size [bp] | template                          | Primers used               |
|-----|----------------------------------|-----------|-----------------------------------|----------------------------|
| 1   | mx8_integrase gene_PagI_ScaI     | 1945      | pBen39                            | primer No.1<br>primer No.2 |
| 2   | An_d48_ <i>bytAOZ</i>            | 2034      | gDNA from <i>P. fallax</i> An d48 | primer No.1<br>primer No.2 |

**Table S12.** List of plasmids used in this study.

| No. | Plasmid name/<br>characteristic | Size<br>[kb] | Function                                                                                | Reference   |
|-----|---------------------------------|--------------|-----------------------------------------------------------------------------------------|-------------|
| 1   | pFP <sub>van</sub> _pcyA        | 6.181        | pCR 2.1 TOPO derivative; used as backbone for heterologous expression of <i>bytAO</i>   | [1]         |
| 2   | pBen39                          | 7.616        | mx8_integrase fragment mobilized on pUC-based plasmid pBen38/ <i>kanR</i> , <i>ampR</i> | unpublished |

**Table S13.** List of genetic constructs generated in this study.

| No. | Plasmid name                              | Construction details/ characteristics                                                                                       |
|-----|-------------------------------------------|-----------------------------------------------------------------------------------------------------------------------------|
| 1   | pFP <sub>Van</sub> <sub>pcyA</sub> _mx8   | Construct obtained by conventional restriction ligation of plasmid pFP <sub>Van</sub> <sub>pcyA</sub> and PCR product No. 1 |
| 2   | pFP <sub>Van</sub> <sub>bytAOZ</sub> _mx8 | Construct obtained by conventional restriction ligation of construct No. 1 and PCR product No. 2                            |

## 2.1 Genetic investigations

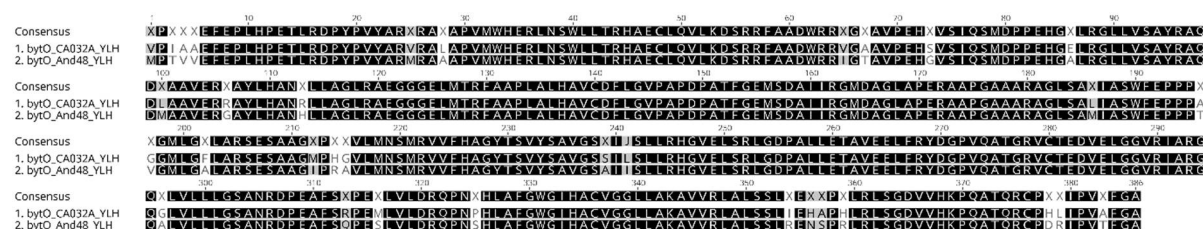

**Figure S1.** Amino acid alignment of myxobacterial BytO homologs from *Pyxidicoccus* sp. CA032A (*bytO*\_CA032A\_YLH) and *Pyxidicoccus fallax* An d48 (*bytO*\_And48\_YLH). Pairwise identity and identical sites: 91.5%.

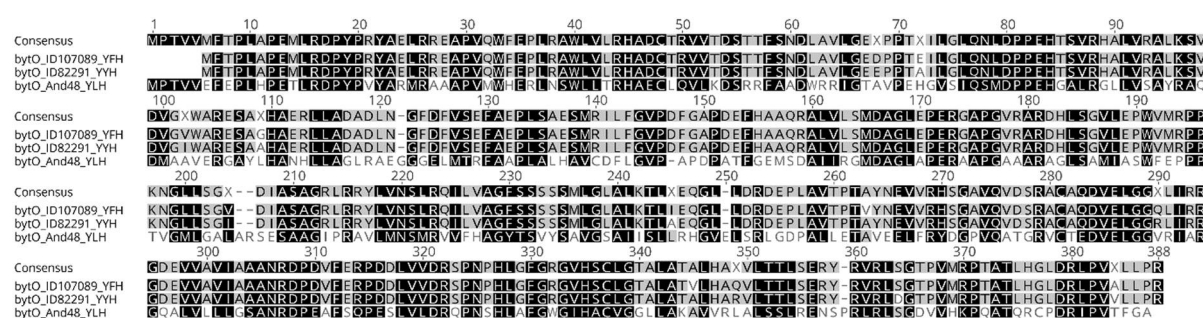

**Figure S2.** Amino acid alignment of BytO homologs from *Planomonospora* sp. ID107089 (*bytO*\_ID107089\_YFH), *Planomonospora* sp. ID82291 (*bytO*\_ID82291\_YYH) and *Pyxidicoccus fallax* An d48 (*bytO*\_And48\_YLH). Pairwise identity: 59.5%, Identical sites: 40.7%.

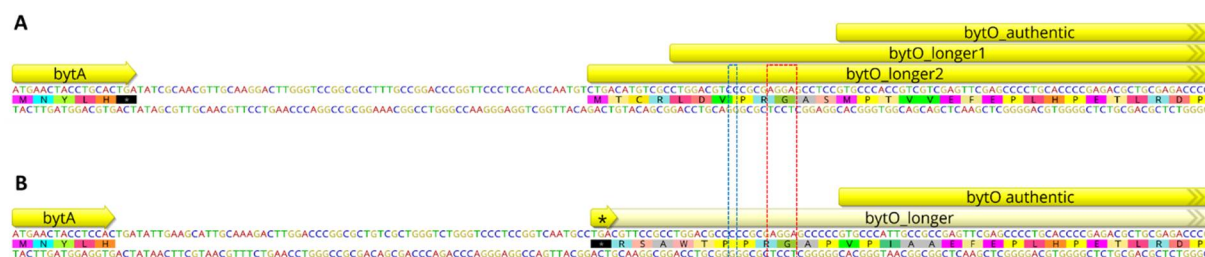

**Figure S3.** Nucleotide sequence and different orfs of *bytO* in *Pyxidicoccus fallax* An d48 (A) and *Pyxidicoccus* sp. CA032A (B) that are varying in nucleotide length. The length of a hypothetical *bytO* gene in *Pyxidicoccus* sp. CA032A is limited by the presence of a stop codon in the same translational frame. *Pyxidicoccus fallax* An d48 features in this genetic locus a single nucleotide deletion, which causes a frame shift (blue dashed box). Therefore two hypothetical longer orfs of *bytO* could be possibly expressed. Nevertheless, the most likely start of the myxobacterial *bytO* is in both nucleotide sequences labeled as *bytO* authentic for the following two reasons; firstly, a putative RBS (red dashed box) is only present in front of *bytO* authentic, and secondly in *Pyxidicoccus* sp. CA032A, only *bytO* authentic can be expressed, since any other longer version does not feature an appropriate start codon.

## 2.2 Heterologous production of Myxarylin in *M. xanthus* DK1622

To express the identified Myxarylin-BGC in *M. xanthus* DK1622, an expression vector was constructed based on the plasmid pFP<sub>van</sub><sub>pcyA</sub>. [1] To enable efficient genomic integration of the expression plasmid, the *mx8* integrase gene originating from the bacteriophage Mx8 was PCR-amplified (Phusion™ High-Fidelity polymerase, Thermo Fisher Scientific) from pBen39 and the resulting PCR product subcloned into pFP<sub>van</sub><sub>pcyA</sub> via conventional restriction ligation (PacI, ScaI). The resulting plasmid pFP<sub>van</sub><sub>pcyA</sub><sub>mx8</sub> (genetic construct 1) was subsequently used to incorporate the PCR-amplified Myxarylin-BGC (An\_d48\_*bytAOZ*, PCR product 2) from *P. fallax* An d48, which led to the final expression vector pFP<sub>van</sub><sub>bytAOZ</sub><sub>mx8</sub> (genetic construct 2). The PCR-amplified operon (An\_d48\_*bytAOZ*, PCR product 2) differs from the natural sequence in that sense, it lacks the intergenic region between *bytA* and *bytO* (termed *bytAO*\_intergenic region, **Figure S3**).

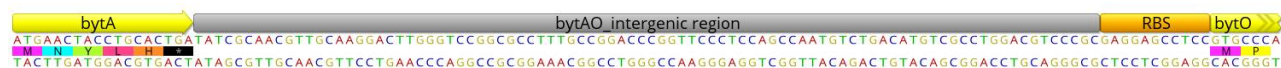

**Figure S4.** Nucleotide sequence encoding the precursor peptide BytA, the intergenic region termed *bytAO*, the putative ribosome binding site of *bytO*, and the first seven nucleotides encoding the cytochrome P450-dependent enzyme BytO.

Since the intergenic region *bytAO* features *in silico* the formation of secondary structures (**Figure S5**) – resembling those of known transcriptional terminators such as the *tD1* terminator from *M. xanthus* bacteriophage Mx8 [2] – the heterologous expression construct was designed in a way to omit this 90 bp intergenic region and only includes 11 bp in which a putative ribosome binding site is incorporated (..AGGA..) (**Figure S6**).

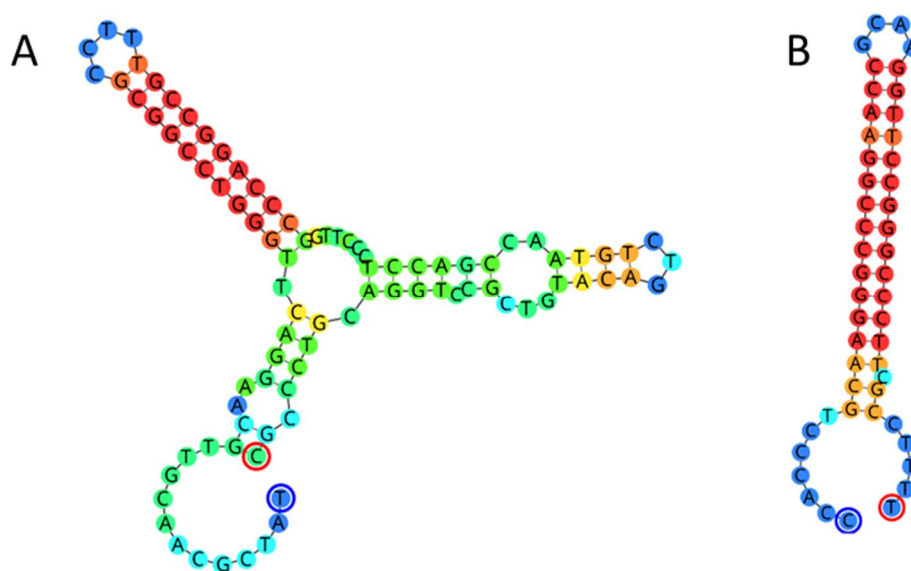

**Figure S5.** Predicted secondary structure of the 90 bp intergenic region *bytAO* (A), and the hair pin structure of the previously described 49 bp transcriptional terminator *tD1* (B).

A

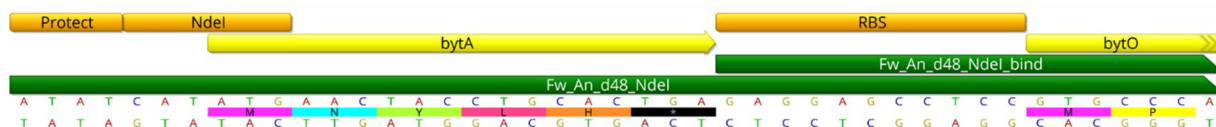

B

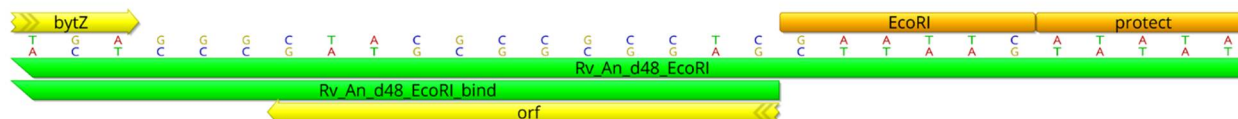

**Figure S6.** A) Nucleotide sequence and annotation of the primer Fw\_An\_d48\_NdeI (Primer 3, 43 bp). Primer 3 comprises at the 5' end extensions which include a protection site for the NdeI restriction site, the authentic *bytA* nucleotide sequence, the identified RBS site of *bytO* and the first seven nucleotides of the gene encoding BytO. Within Primer 3, 18 bp at the 3' end is responsible for the site-specific annealing (termed Fw\_An\_d48\_NdeI\_bind). B) The associated reverse primer Rv\_An\_d48\_EcoRI (Primer 4, 29 bp), was designed in a way that the genetic region downstream of *bytZ* remained unmodified in the respective PCR product. Hence, Primer 4 features at the 5' end an extension for the EcoRI restriction site including a 5 bp protection site and 18 bp at the 3' end for site-specific annealing (termed Rv\_An\_d48\_EcoRI\_bind).

## 3 Compound Characterization

### 3.1 Tandem MS spectra

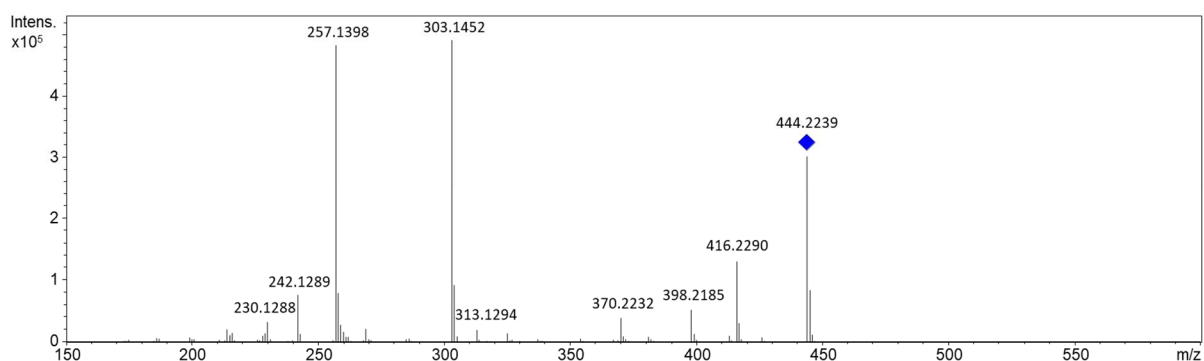

**Figure S7.** Tandem MS spectrum of **1** (collision energy: 35.0 eV). Leucine loss ( $\Delta m/z = 113.0841$ ) is visible e.g. between 416.2290  $m/z$  and 303.1452  $m/z$  (err. 0.0003  $m/z$ ) or 370.2232  $m/z$  and 257.1398  $m/z$  (err. 0.0007  $m/z$ ).

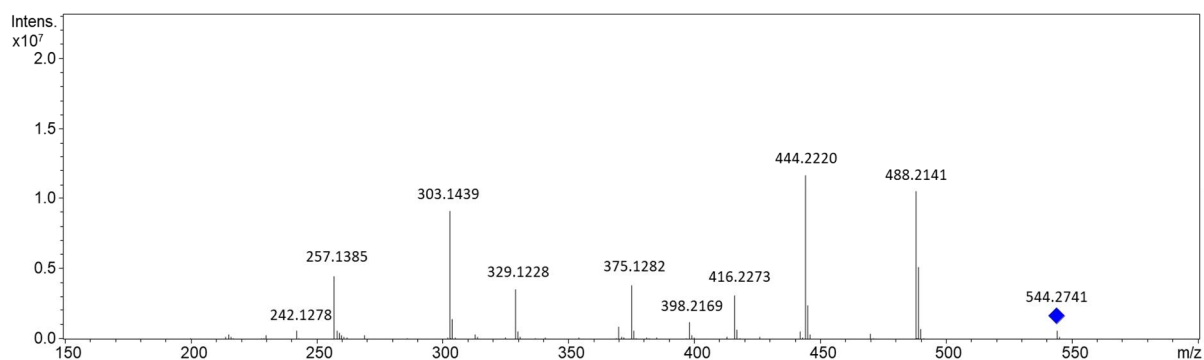

**Figure S8.** Tandem MS spectrum of **2** (collision energy: 35.9 eV).

## 3.2 Structure elucidation

### 3.2.1 NMR-based structure elucidation

**Table S14.** NMR spectroscopic data of **2** measured in methanol- $d_4$  at 700/175 MHz.

| #        | $\Delta^{13}\text{C}$<br>[PPM] | $\Delta^1\text{H}$ [PPM], MULT ( $J$<br>[HZ]) | $\Delta^{15}\text{N}$<br>[PPM] | COSY        | HMBC            | SEL<br>NOESY | $^1\text{H}$ - $^{15}\text{N}$<br>HMBC |
|----------|--------------------------------|-----------------------------------------------|--------------------------------|-------------|-----------------|--------------|----------------------------------------|
| 1        | 171.8                          | -                                             | -                              | -           | -               | n.m.         | -                                      |
| 2        | 59.7                           | 4.66, m                                       | -                              | 3           | -               | n.m.         | -                                      |
| 3        | 34.2                           | 3.55,2.56, dd (15.19,<br>11.77)               | -                              | 2,3,5       | 1,2,5,9         | n.m.         | -                                      |
| 4        | 131.1                          | -                                             | -                              | -           | -               | n.m.         | -                                      |
| 5        | 126.1                          | 6.84, m                                       | -                              | -           | -               | n.m.         | -                                      |
| 6        | -                              | -                                             | -                              | -           | -               | n.m.         | -                                      |
| 7        | 149.7                          | -                                             | -                              | -           | -               | n.m.         | -                                      |
| 8        | 118.1                          | 6.91, brs                                     | -                              | 9           | 4,5,7,9         | 9            | -                                      |
| 9        | 130.2                          | 7.03, d (8.13)                                | -                              | 8           | 3,5,7,8         | n.m.         | -                                      |
| 10       | 157.6                          | -                                             | -                              | -           | -               | n.m.         | -                                      |
| 11       | 81.9                           | -                                             | -                              | -           | -               | n.m.         | -                                      |
| 12,13,14 | 28.8                           | 1.48, s                                       | -                              | -           | 11,12,13,14-    | n.m.         | -                                      |
| 15       | 30.7                           | 2.90, s                                       | -                              | -           | 2,10            | n.m.         | 16                                     |
| 1'       | 173.7                          | -                                             | -                              | -           | -               | n.m.         | -                                      |
| 2'       | 52.8                           | 4.86, s                                       | -                              | 3'          | 1,1',3',4'      | n.m.         | -                                      |
| 3'       | 43.7                           | 1.58, m                                       | -                              | 2',5',6'    | 4'              | n.m.         | -                                      |
| 4'       | 26.1                           | 1.60, m                                       | -                              | 5',6'       | -               | n.m.         | -                                      |
| 5',6'    | 23.8                           | 0.94, m                                       | -                              | 3'          | -               | n.m.         | -                                      |
| 1''      | 177.8                          | -                                             | -                              | -           | -               | n.m.         | -                                      |
| 2''      | 55.2                           | 4.61, dd (12.62, 2.78)                        | -                              | 3''         | 1',1'',3'',4''  | n.m.         | -                                      |
| 3''      | 33.0                           | 3.32,2.82, dd (16.47,<br>12.62)               | -                              | 2'',3'',6'' | 1'',2'',4'',6'' | n.m.         | 18,20                                  |
| 4''      | 139.3                          | -                                             | -                              | -           | -               | n.m.         | -                                      |
| 5''      | 138.5                          | 7.94, s                                       | -                              | 6''         | 4'',6''         | -            | 19,20                                  |
| 6''      | 118.9                          | 6.89, s                                       | -                              | 3'',5''     | 4'',5''         | -            | 19,20                                  |
| 16       | -                              | -                                             | 84.7                           | -           | -               | n.m.         | -                                      |
| 17       | -                              | -                                             | -                              | -           | -               | n.m.         | -                                      |
| 18       | -                              | -                                             | 123.1                          | -           | -               | n.m.         | -                                      |
| 19       | -                              | -                                             | 174.6                          | -           | -               | n.m.         | -                                      |
| 20       | -                              | -                                             | 247.3                          | -           | -               | n.m.         | -                                      |

n.m.: not measured

**Table S15.** NMR spectroscopic data of **1** measured in DMSO-d<sub>6</sub> at 700/175 MHz.

| #          | $\Delta^{13}\text{C}$ [PPM] | $\Delta^1\text{H}$ [PPM], MULT ( <i>J</i> [HZ]) | COSY    | HMBC            |
|------------|-----------------------------|-------------------------------------------------|---------|-----------------|
| <b>1</b>   | 166.6                       | -                                               | -       | -               |
| <b>2</b>   | 61.1                        | 4.08, m                                         | 3,16    | -               |
| <b>3</b>   | 33.1                        | 3.16, m                                         | 2,5,9   | 1,2,5,9         |
| <b>4</b>   | -                           | -                                               | -       | -               |
| <b>5</b>   | 127.8                       | 6.81, d (2.25)                                  | 3,9     | 3,7,9           |
| <b>6</b>   | 125.3                       | -                                               | -       | -               |
| <b>7</b>   | 149.3                       | -                                               | -       | -               |
| <b>8</b>   | 117.1                       | 7.08, d (8.34)                                  | 9       | 6,7             |
| <b>9</b>   | 131.8                       | 7.23, dd (8.24,2.25)                            | 3,5,8   | 3,7,8           |
| <b>15</b>  | 31.3                        | 2.50, m                                         | 16      | 2               |
| <b>1'</b>  | 171.9                       | -                                               | -       | -               |
| <b>2'</b>  | 51.5                        | 4.71, td (9.06,5.4)                             | 3',17   | -               |
| <b>3'</b>  | 42.1                        | 1.54,1.48, m                                    | 2',4'   | 1',2',4',5',6'  |
| <b>4'</b>  | 24.1                        | 1.67, m                                         | 5',6'   | 3',5',6'        |
| <b>5'</b>  | 22.7                        | 0.93, d (6.63)                                  | 4'      | 3',4',6'        |
| <b>6'</b>  | 21.6                        | 0.90 d (6.63)                                   | -       | 4',5'           |
| <b>1''</b> | 171.1                       | -                                               | -       | -               |
| <b>2''</b> | 50.6                        | 4.58, ddd (12.25, 9.52, 2.78)                   | 3'',18  | -               |
| <b>3''</b> | 27.0                        | 3.35,2.87, dd (15.19, 12.41)                    | 2'',6'' | 1'',2'',4'',6'' |
| <b>4''</b> | 130.6                       | -                                               | -       | -               |
| <b>5''</b> | 135.6                       | 9.35, s                                         | 6''     | 4'',6''         |
| <b>6''</b> | 120.4                       | 7.16, s                                         | 3'',5'' | 4'',5''         |
| <b>16</b>  | -                           | 8.79, brs                                       | 2       | -               |
| <b>17</b>  | -                           | 9.21, d (8.56)                                  | 2'      | 1               |
| <b>18</b>  | -                           | 8.86, d (9.52)                                  | 2''     | 1'              |

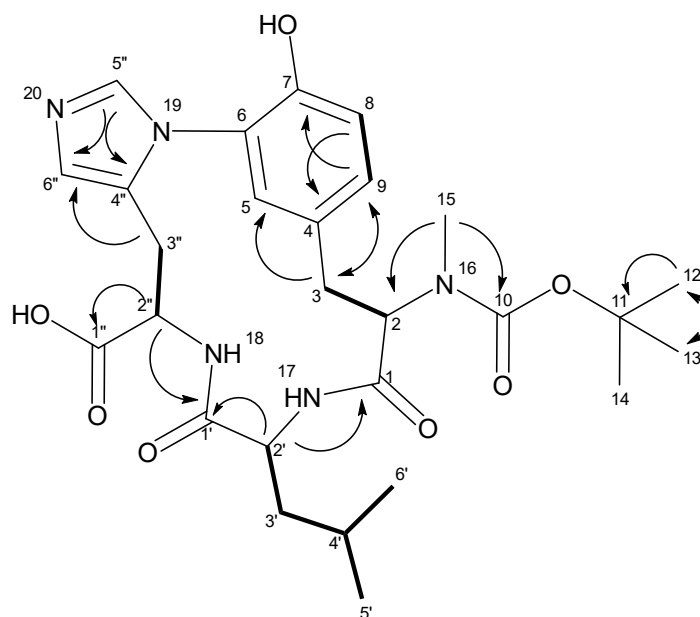

**Figure S9.** Chemical structure and atom numbering of **2**. COSY correlations are represented as bold lines, HMBC correlations are marked with arrows.

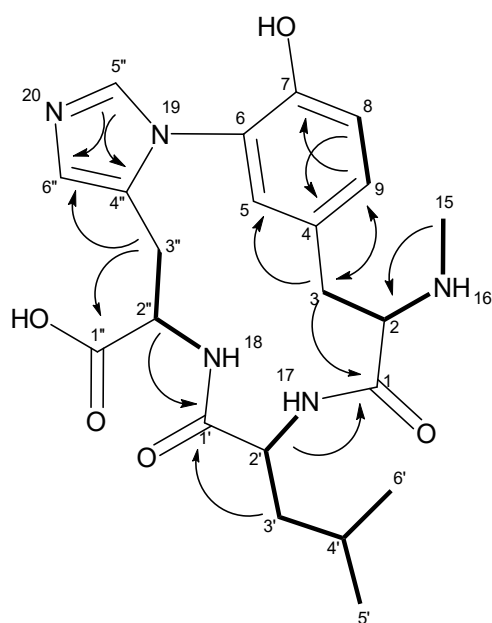

**Figure S10.** Chemical structure and atom numbering of **1**. COSY correlations are represented as bold lines, HMBC correlations are marked with arrows.

### 3.2.2 NMR spectra employed in Myxarylin structure elucidation

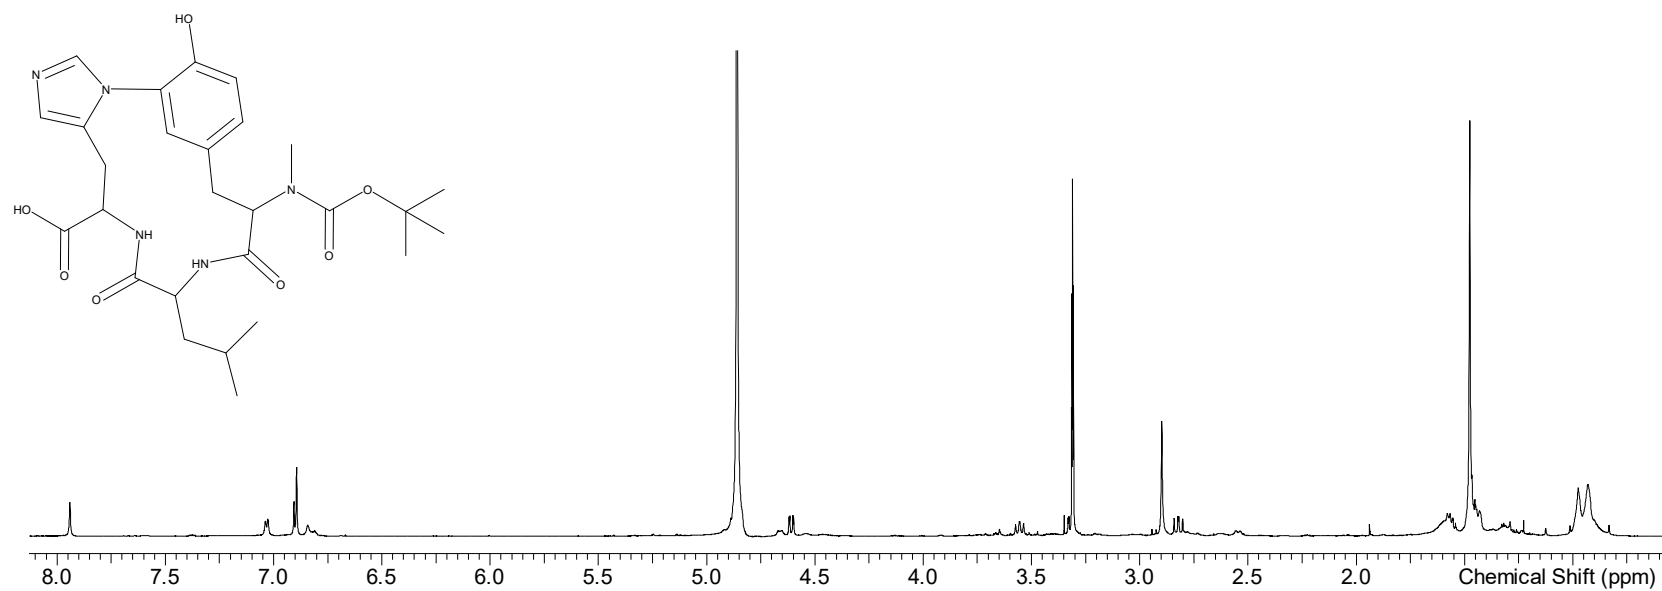

**Figure S11.** <sup>1</sup>H spectrum of **2** measured in methanol-d<sub>4</sub> at 700 MHz.

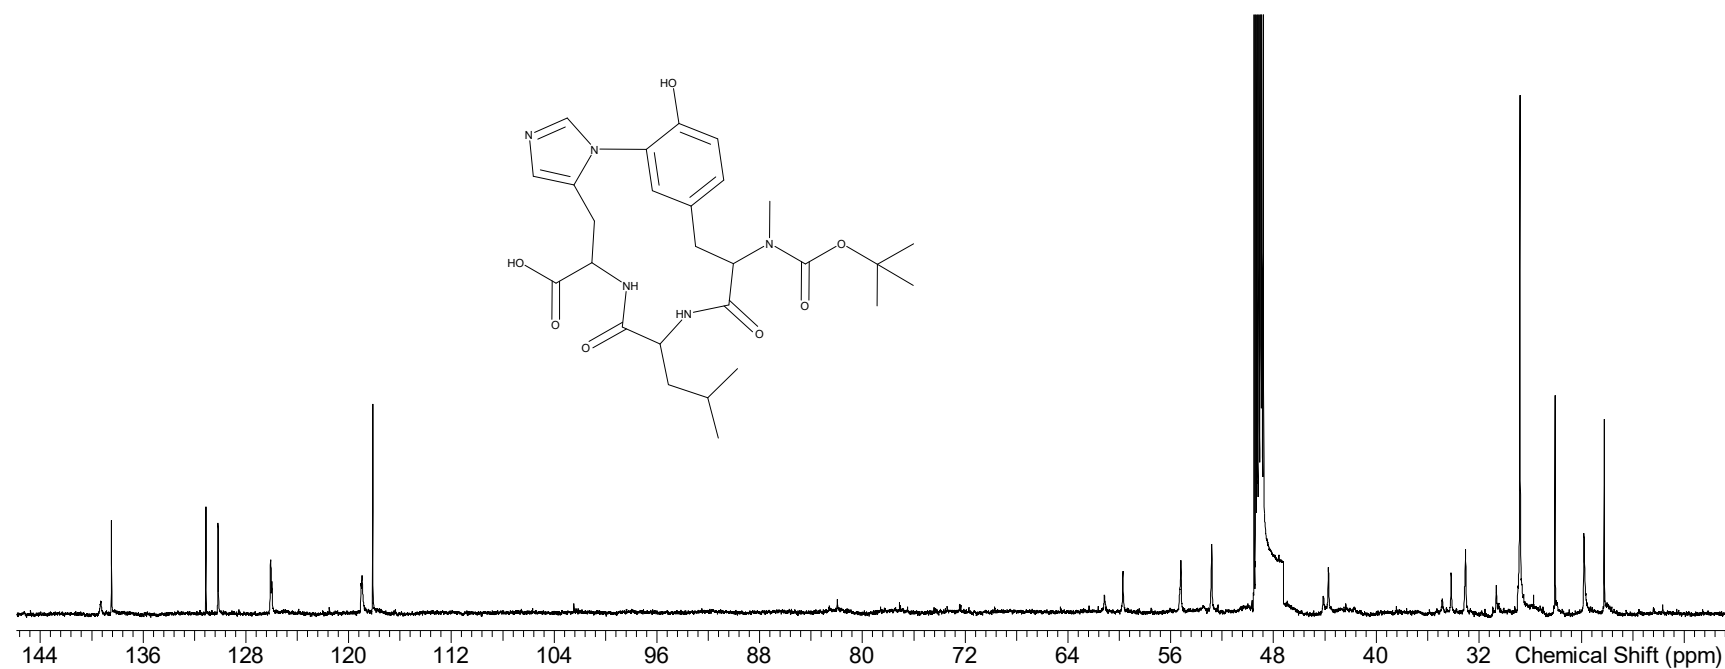

**Figure S12.**  $^{13}\text{C}$  spectrum of **2** measured in methanol- $\text{d}_4$  at 175 MHz.

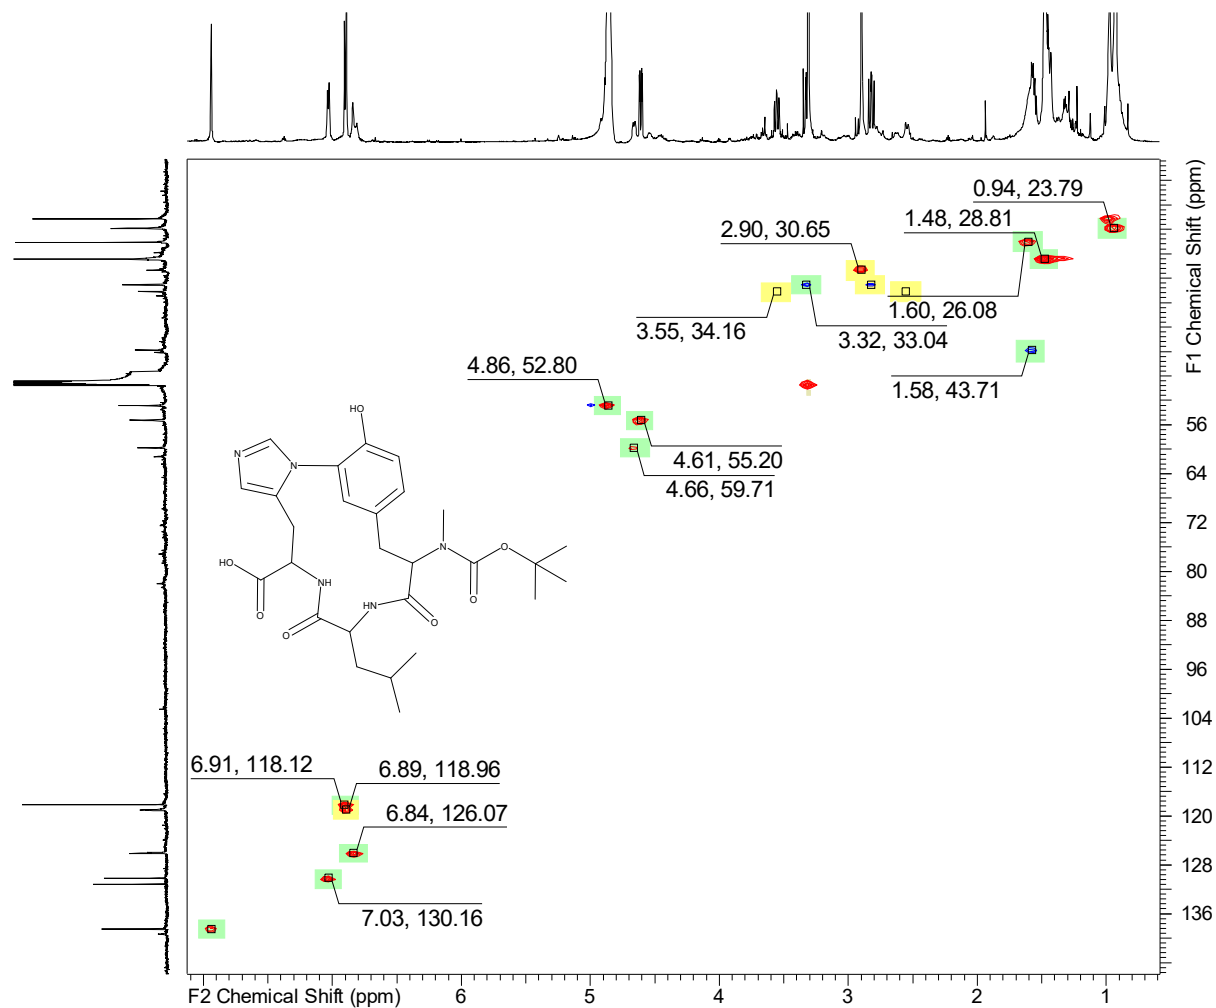

**Figure S13.** HSQC spectrum of **2** measured in methanol- $\text{d}_4$  at 700 ( $^1\text{H}$ ) and 175 ( $^{13}\text{C}$ ) MHz.

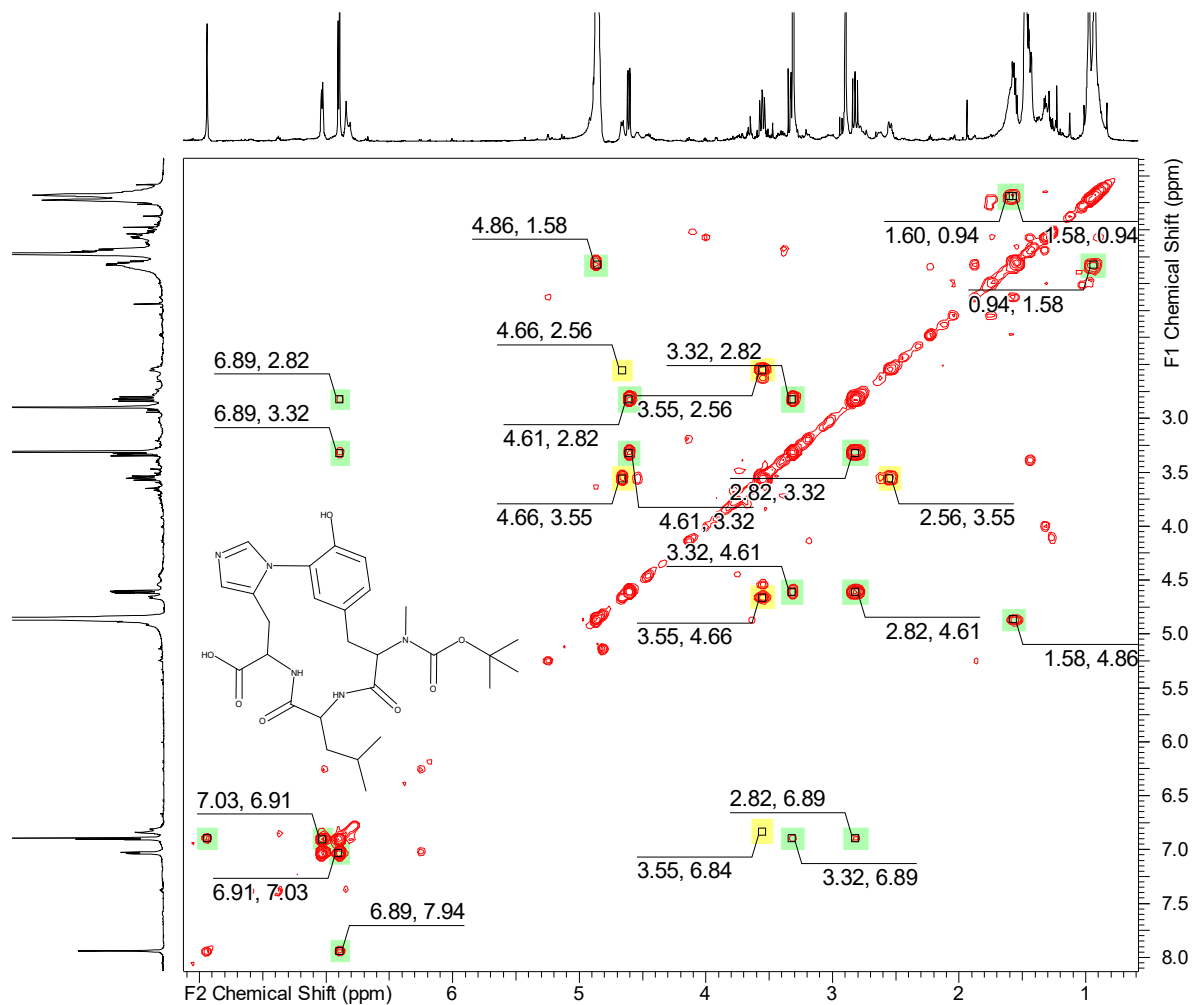

**Figure S14.** COSY spectrum of **2** measured in methanol- $d_4$  at 700 MHz.

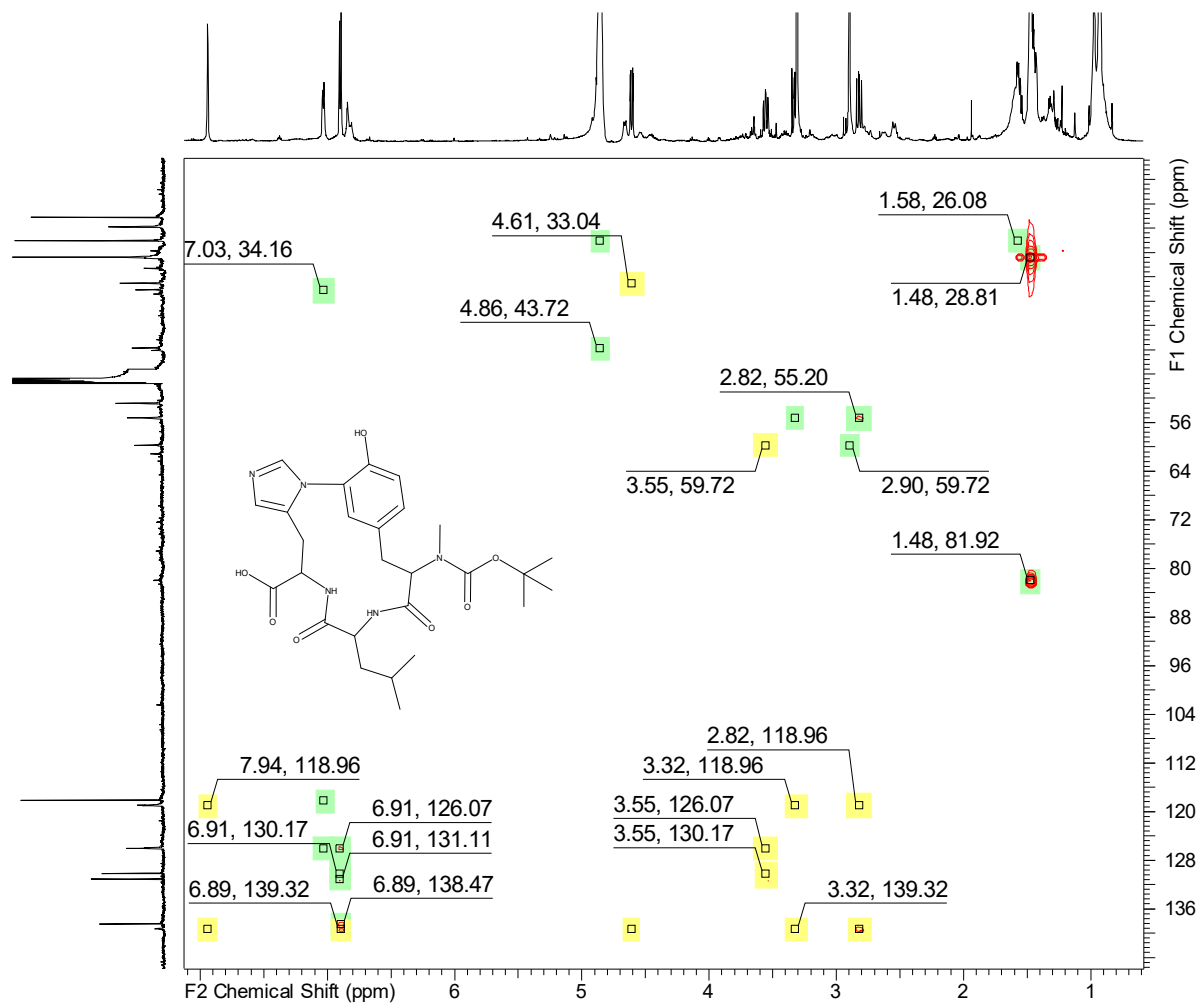

**Figure S15.** HMBC spectrum of **2** measured in methanol- $d_4$  at 700 ( $^1\text{H}$ ) and 175 ( $^{13}\text{C}$ ) MHz.

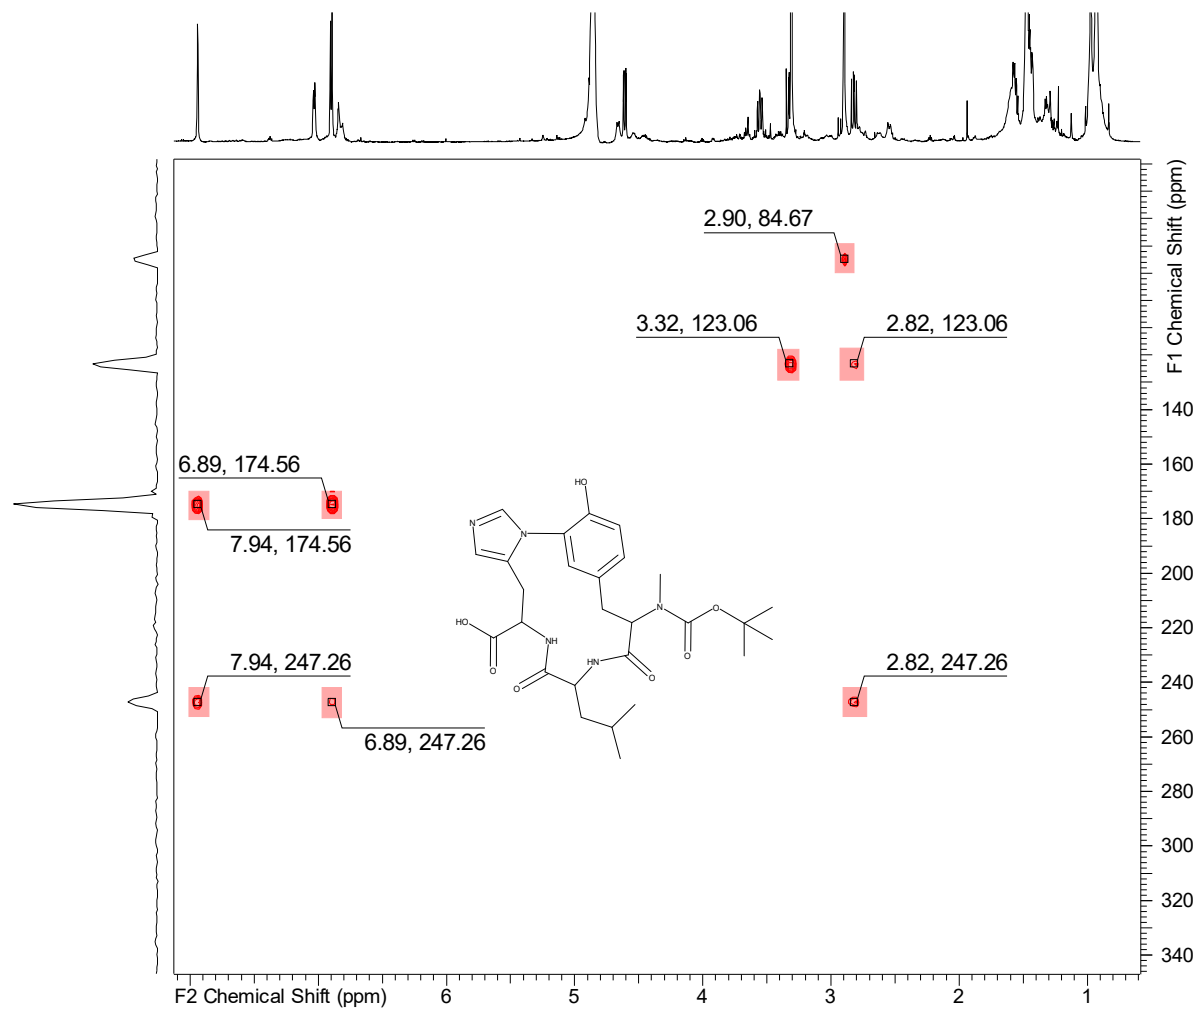

**Figure S16.**  $^1\text{H}$ - $^{15}\text{N}$  HMBC spectrum of **2** measured in methanol- $\text{d}_4$  at 700 ( $^1\text{H}$ ) and 175 ( $^{15}\text{N}$ ) MHz.

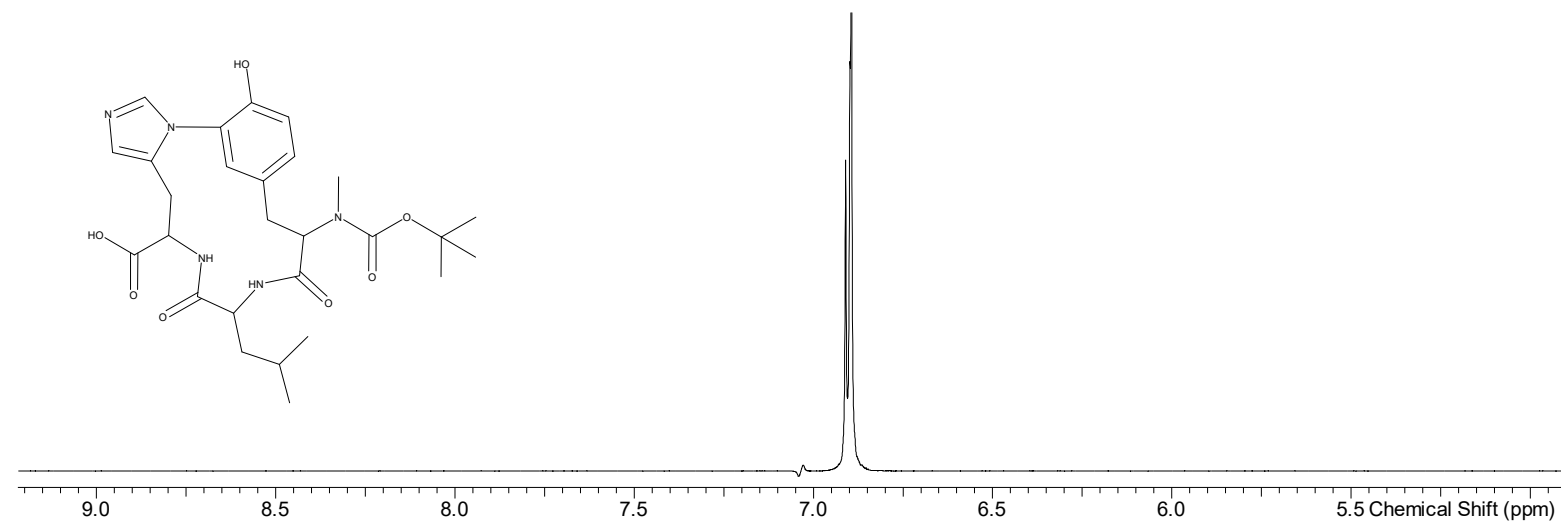

**Figure S17.** Spectrum of 2 exciting at  $\delta(^1\text{H}) = 6.91$  ppm with a distance of 20.32 Hz in methanol- $\text{d}_4$  at 700 MHz.

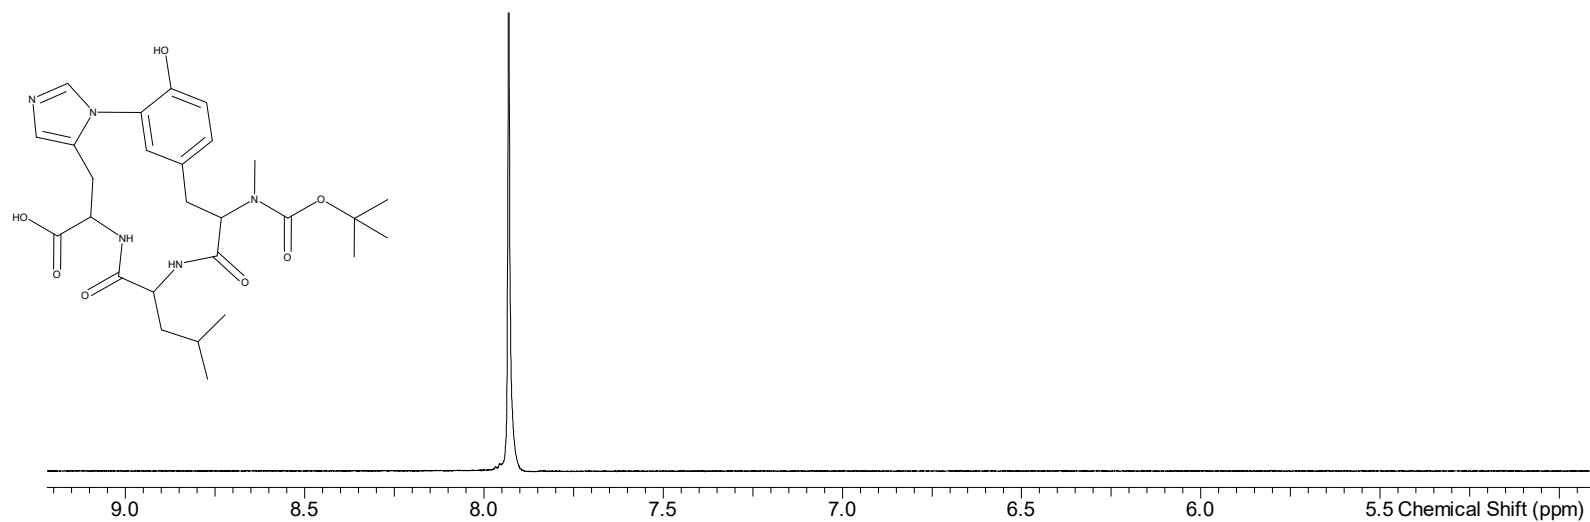

**Figure S18.** Selective 1D NOESY spectrum of **2** exciting at  $\delta(^1\text{H}) = 7.94$  ppm with a distance of 17.20 Hz in methanol- $\text{d}_4$  at 700 MHz.

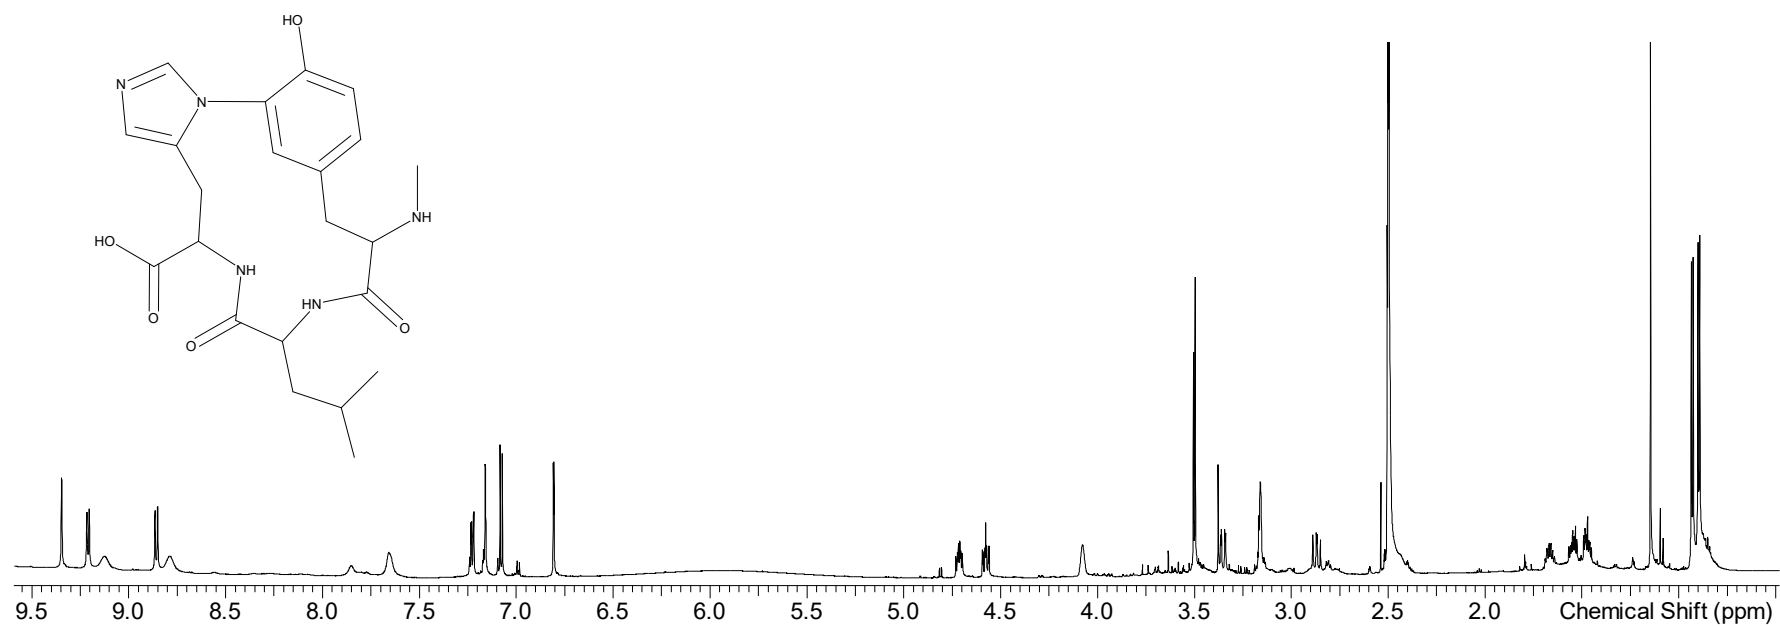

**Figure S19.**  $^1\text{H}$  spectrum of **1** measured in  $\text{DMSO}-d_6$  at 700 MHz.

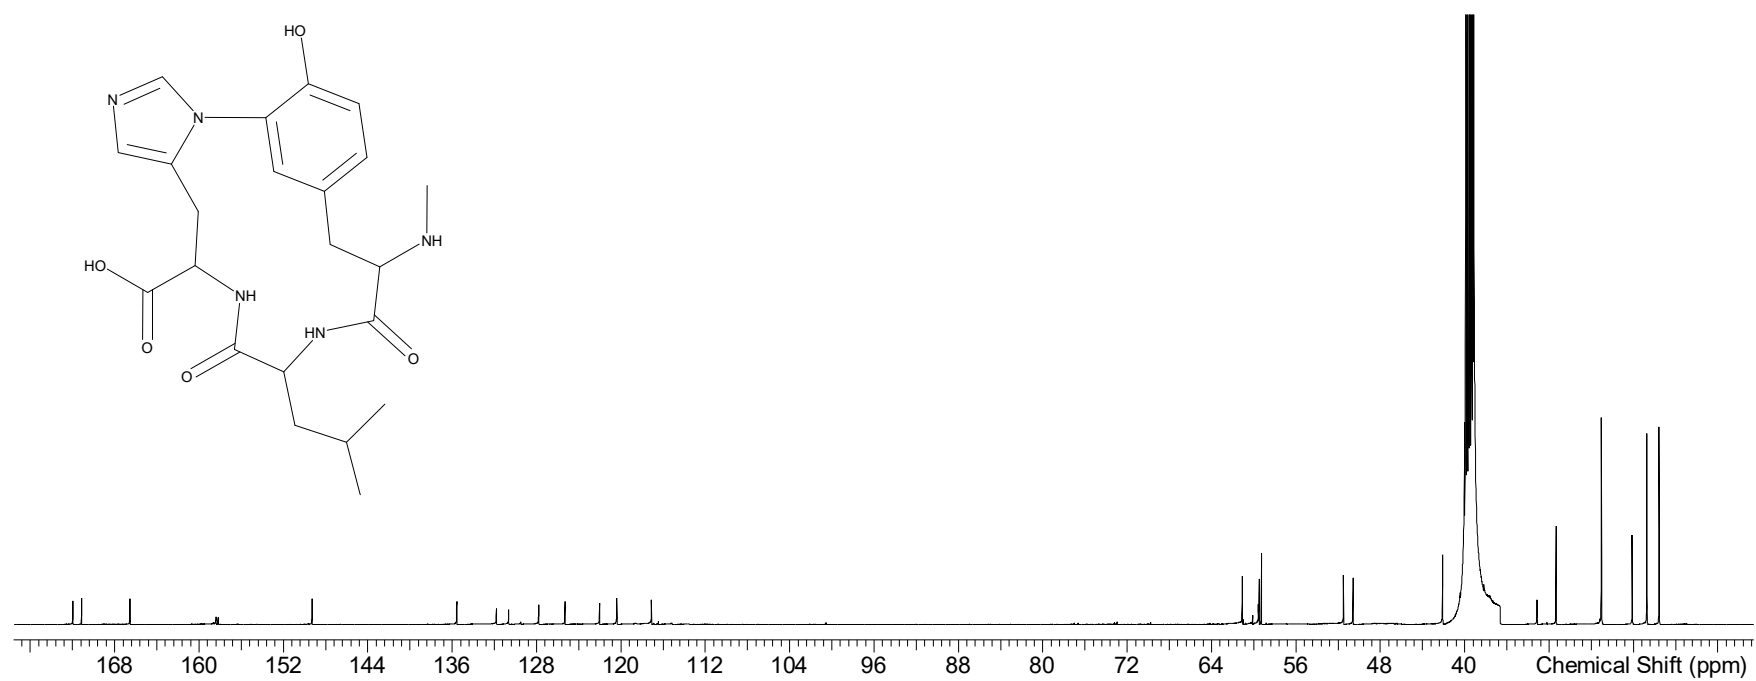

**Figure S20.**  $^{13}\text{C}$  spectrum of **1** measured in  $\text{DMSO}-d_6$  at 175 MHz.

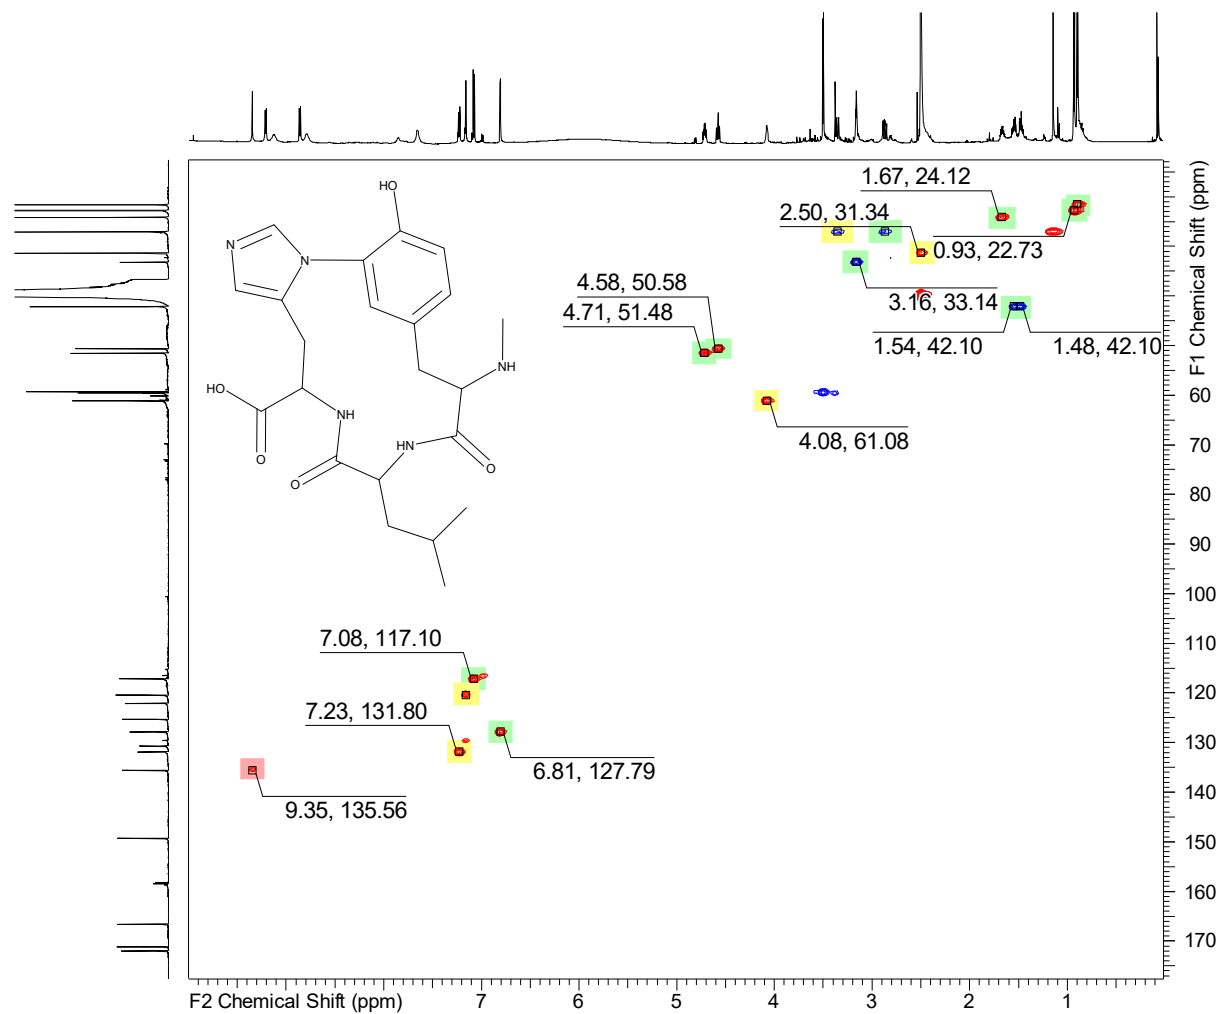

**Figure S21.** HSQC spectrum of **1** measured in  $\text{DMSO}-d_6$  at 700 ( $^1\text{H}$ ) and 175 ( $^{13}\text{C}$ ) MHz.

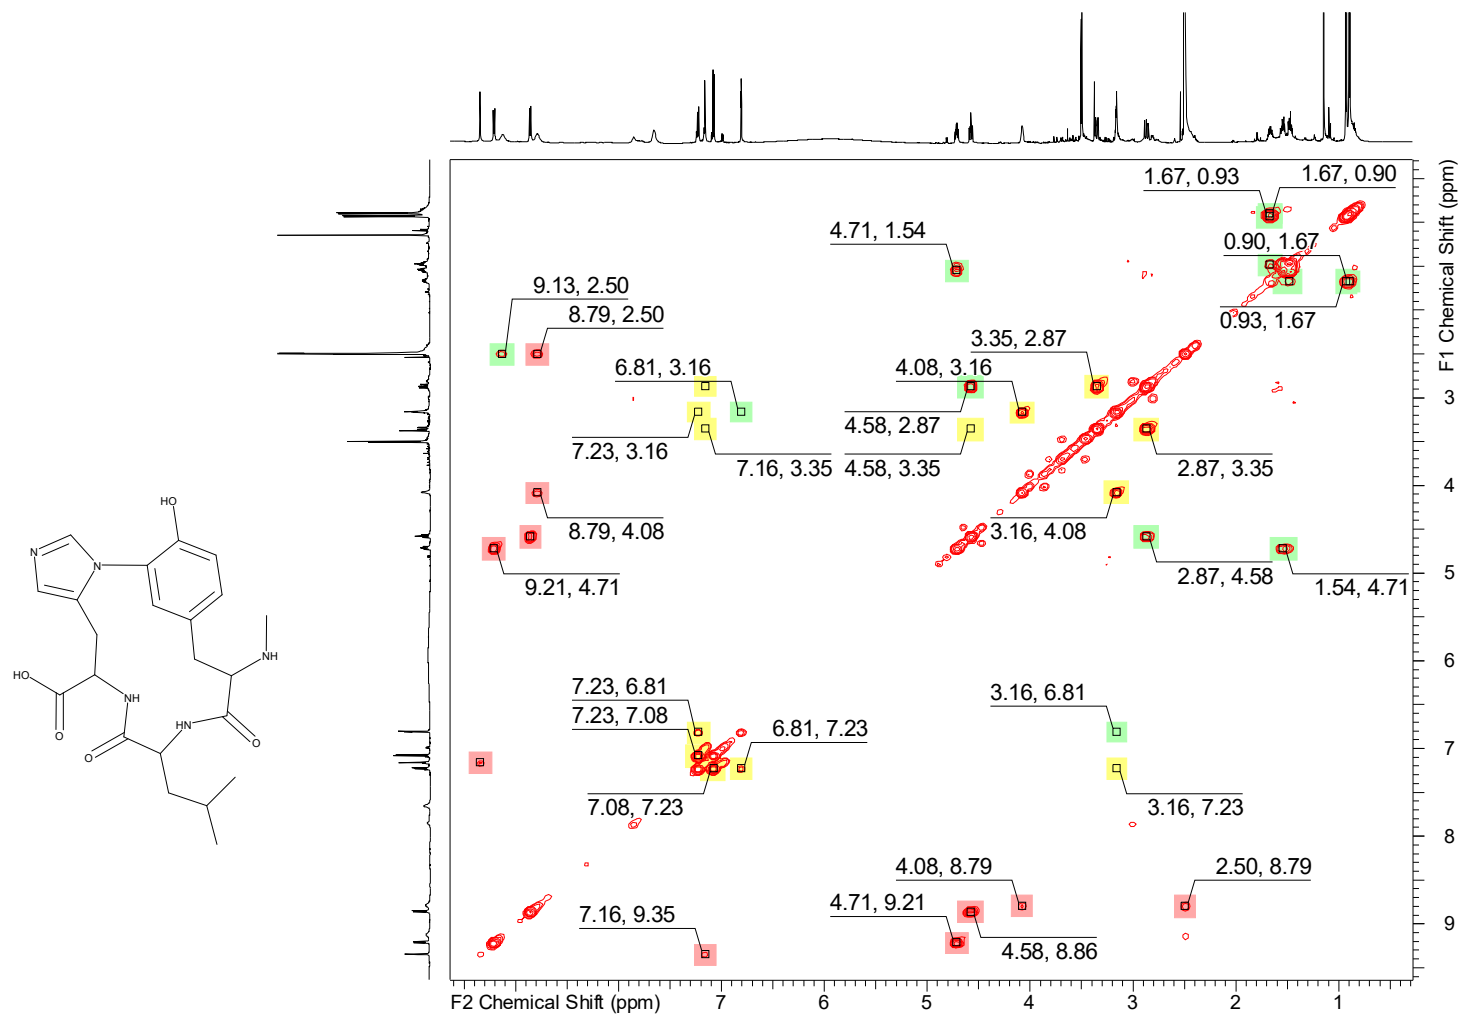

**Figure S22.** COSY spectrum of **1** measured in DMSO-*d*<sub>6</sub> at 700 MHz.

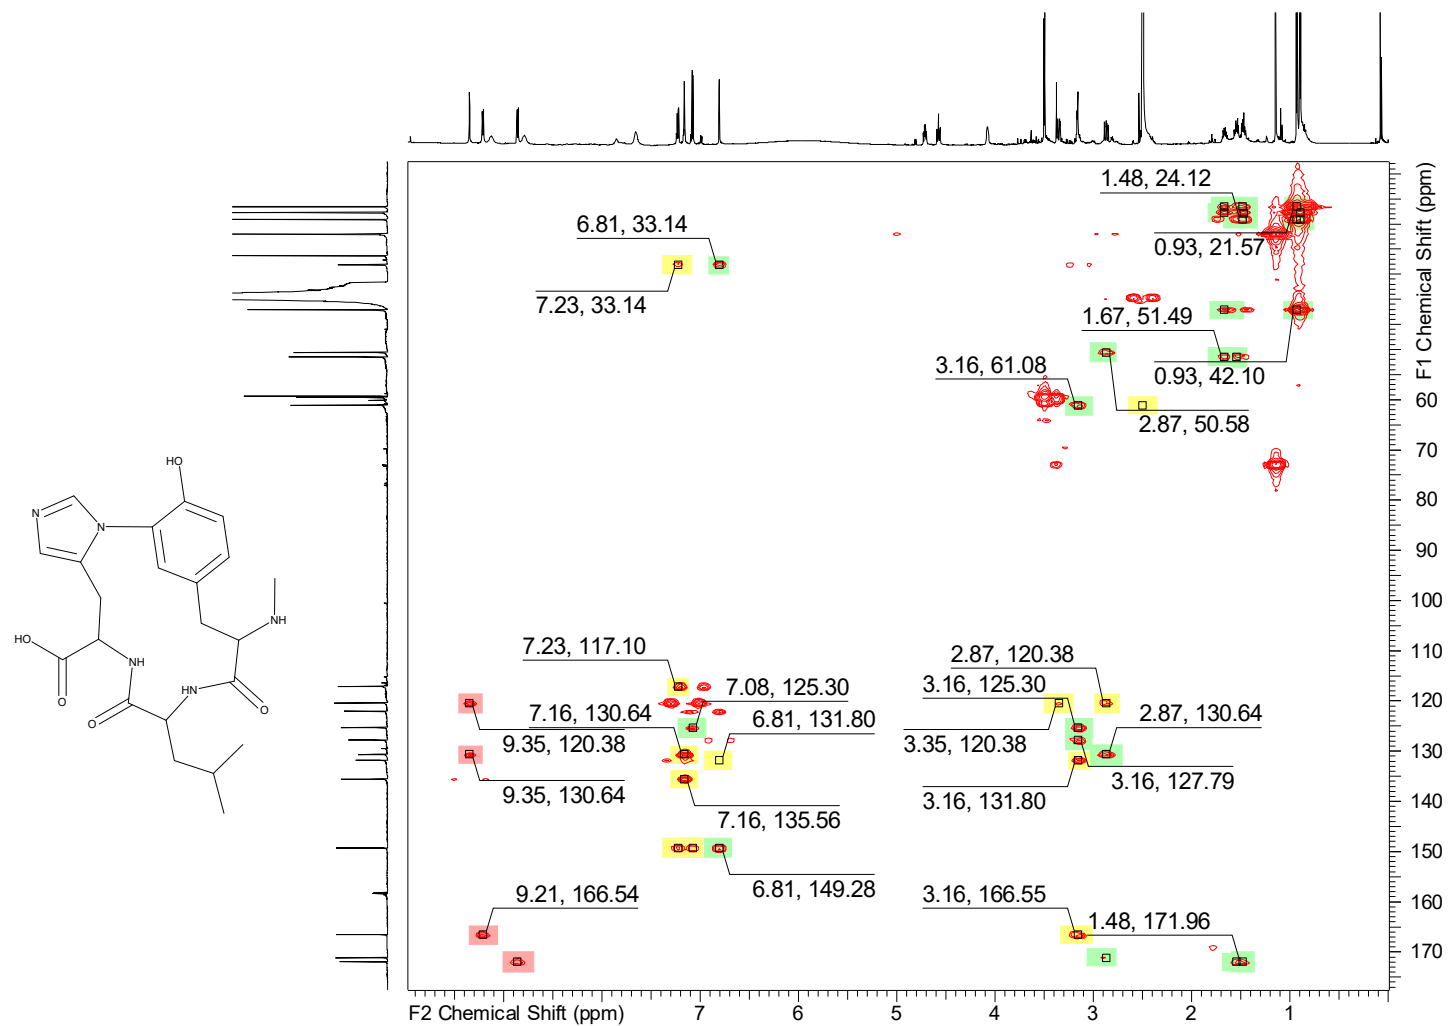

**Figure S23.** HMBC spectrum of **1** measured in  $\text{DMSO-}d_6$  at 700 ( $^1\text{H}$ ) and 175 ( $^{13}\text{C}$ ) MHz.

### 3.2.3 Elucidation of the absolute stereochemistry

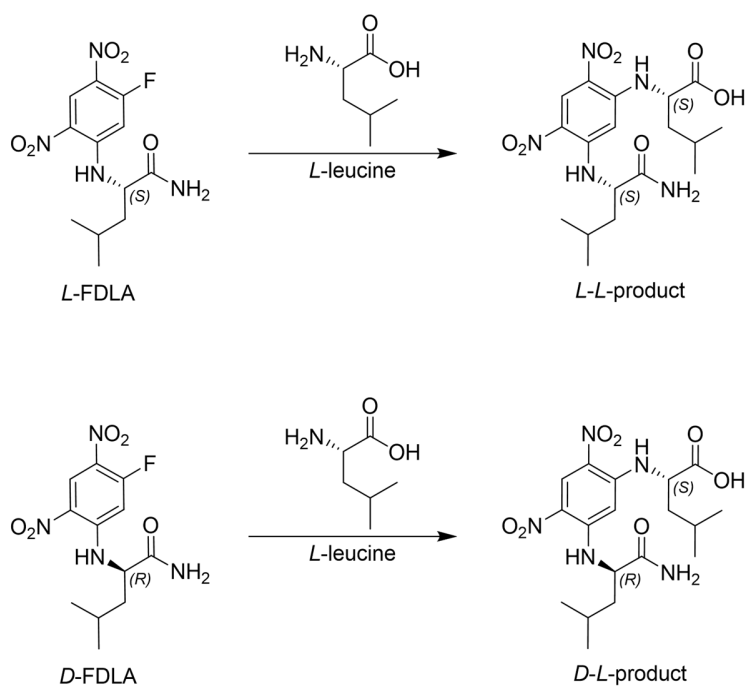

**Figure S24.** Marfey's derivatization reaction of L-leucine standard with L- respective D-(1-fluoro-2,4-dinitrophenyl-5-leucine amide) (FDLA).

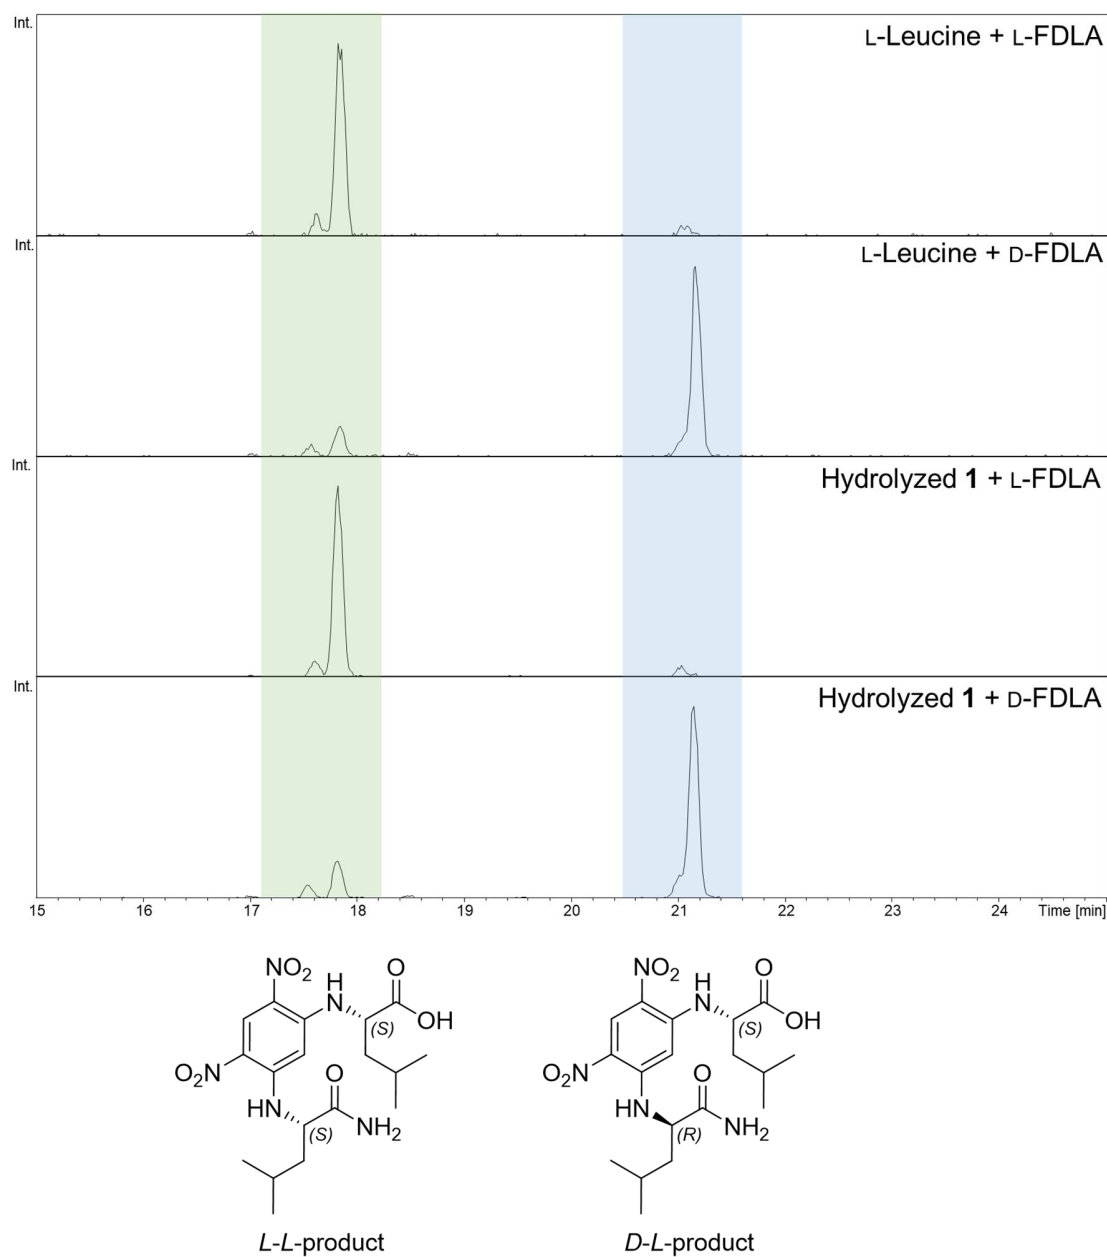

**Figure S25.** HPLC-MS extracted ion chromatograms (EICs) of 426.19833  $m/z$  with a width of 0.005  $m/z$  from Marfey's derivatization reaction with commercial L-leucine standard and hydrolyzed **1**. Highlighted in green: L-L-product peaks; highlighted in blue: D-L-product peaks.

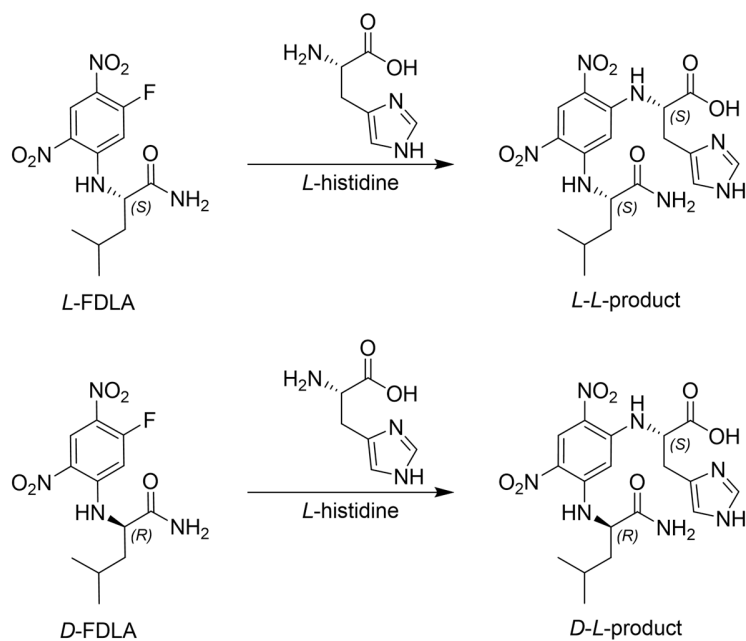

**Figure S26.** Marfey's derivatization reaction of L-histidine standard with L- respective D-(1-fluoro-2,4-dinitrophenyl-5-leucine amide) (FDLA).

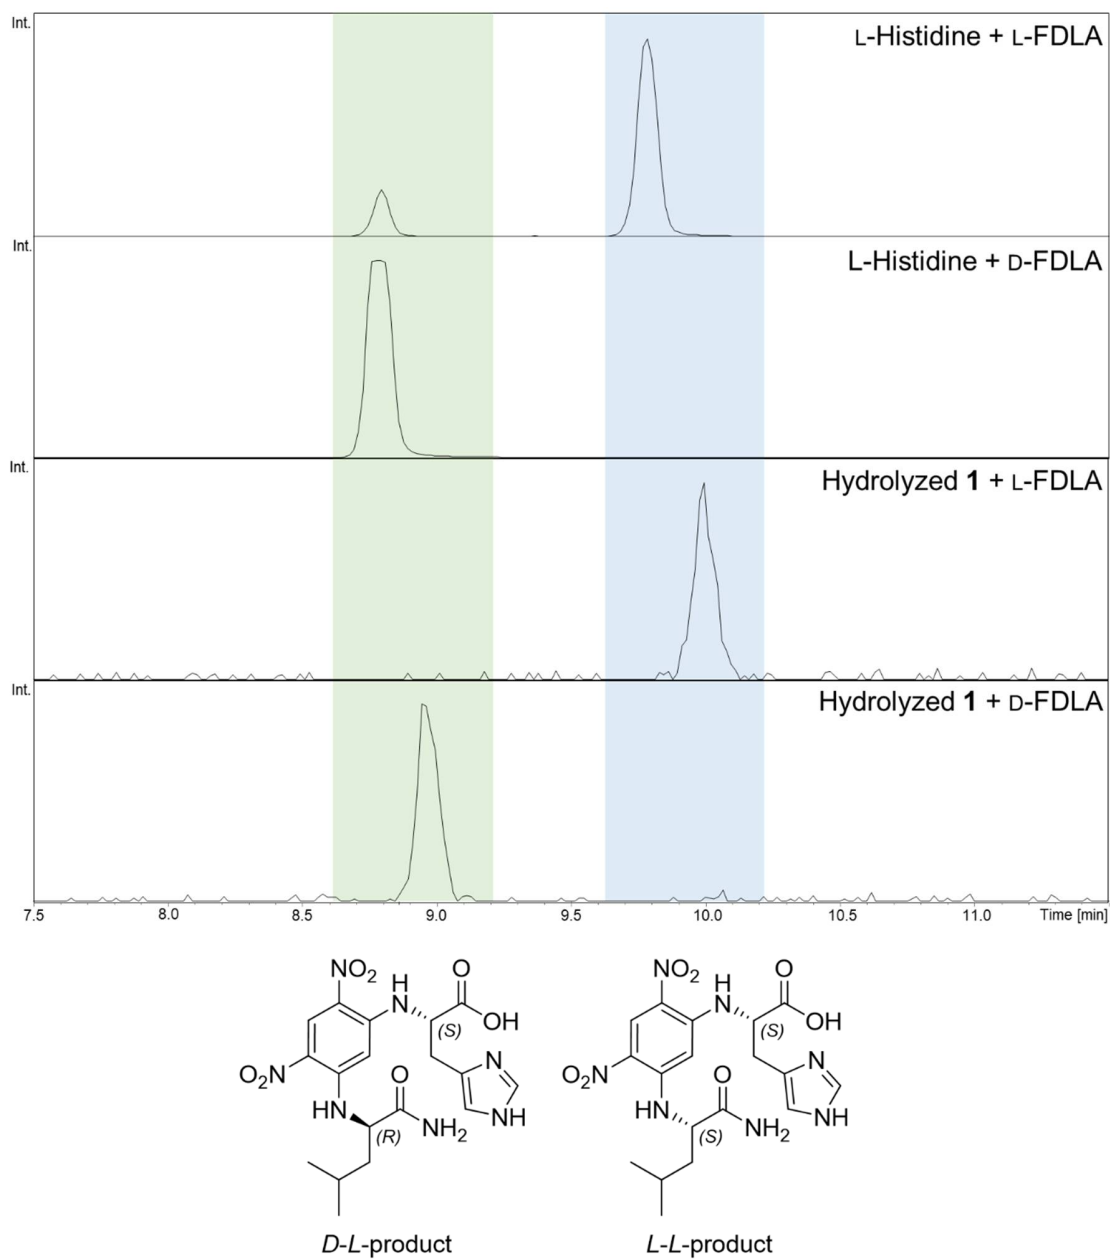

**Figure S27.** HPLC-MS extracted ion chromatograms (EICs) of 450.17317  $m/z$  with a width of 0.005  $m/z$  from Marfey's derivatization reaction with commercial L-histidine standard and hydrolyzed 1. Highlighted in green: D-L-product peaks; highlighted in blue: L-L-product peaks.

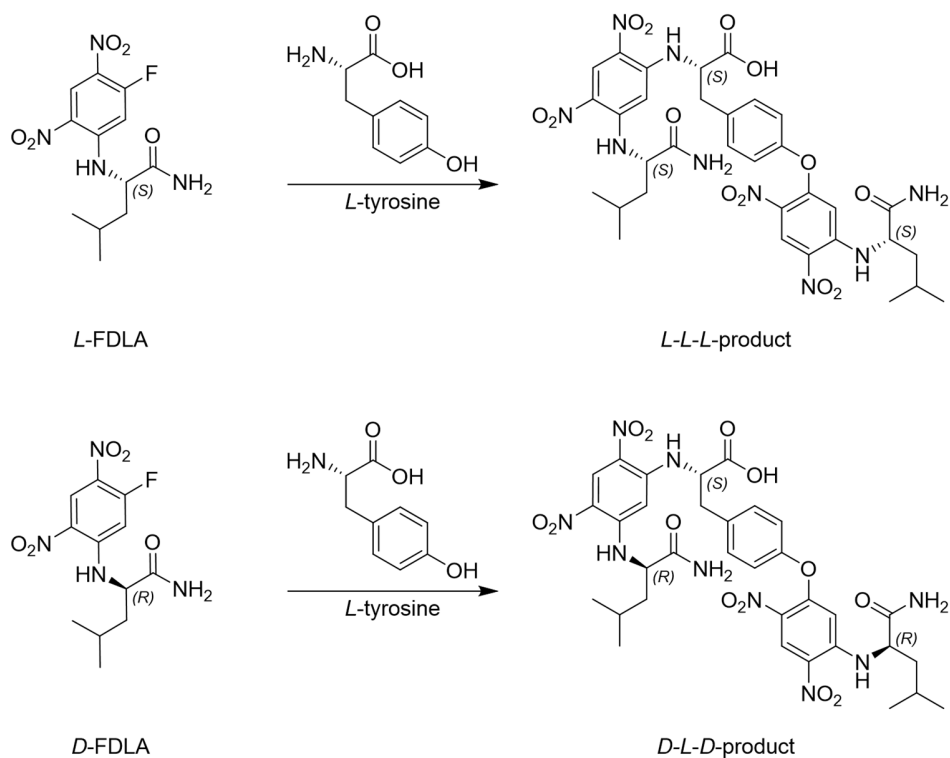

**Figure S28.** Marfey's derivatization reaction of L-tyrosine standard with L- respective D-(1-fluoro-2,4-dinitrophenyl-5-leucine amide) (FDLA). In this case, we mainly observed the double derivatized product as shown above.

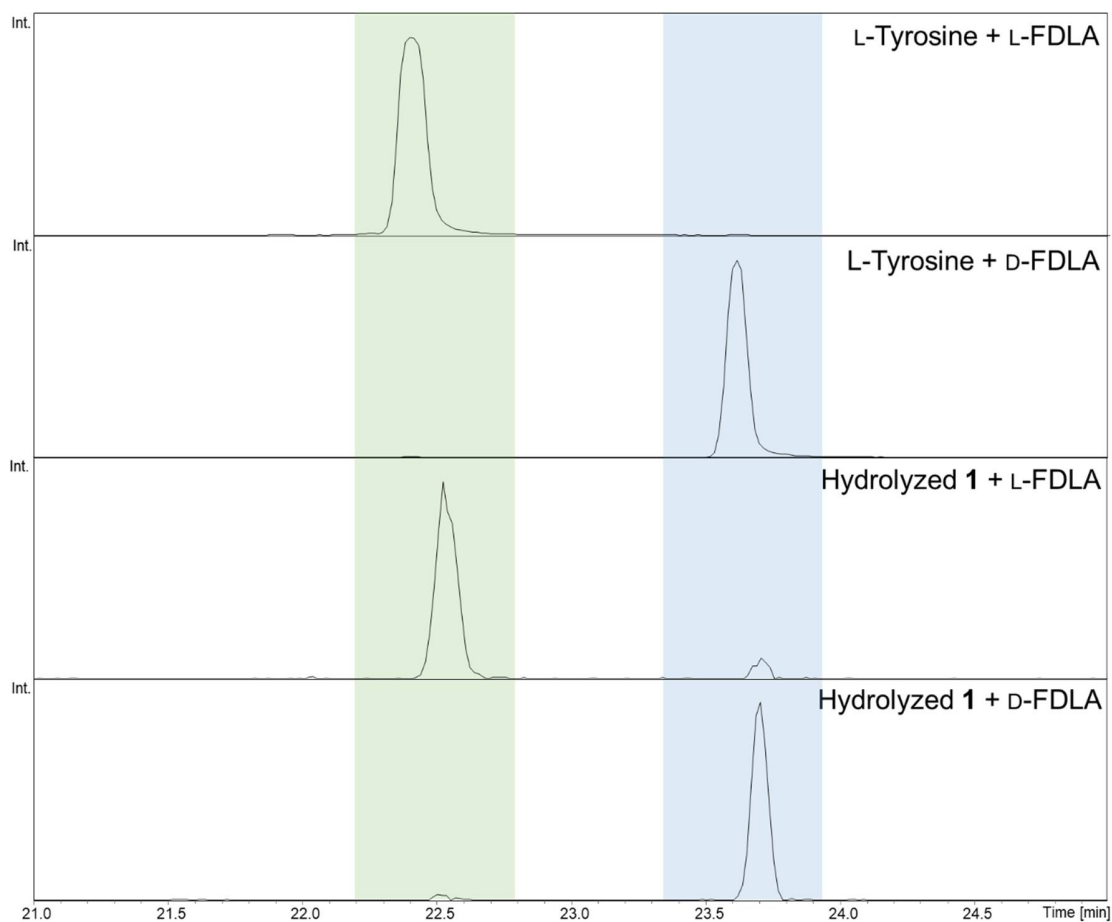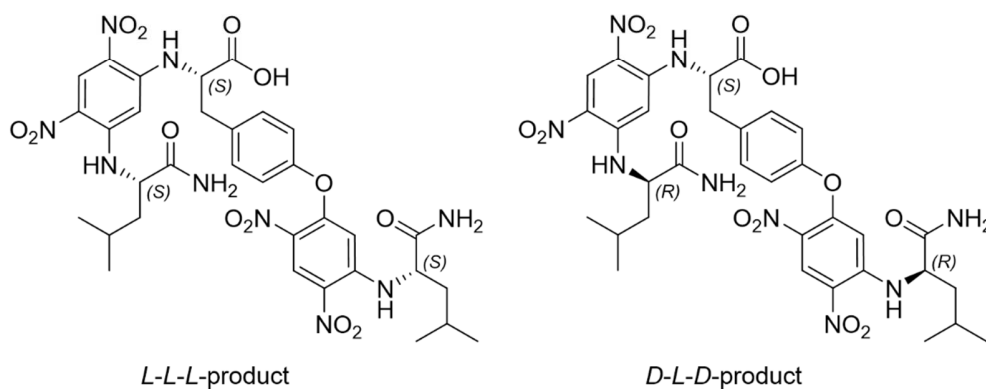

**Figure S29.** HPLC-MS extracted ion chromatograms (EICs) of 770.27401  $m/z$  with a width of 0.005  $m/z$  from Marfey's derivatization reaction with commercial L-tyrosine standard and hydrolyzed **1**. Highlighted in green: L-L-L-product peaks; highlighted in blue: D-L-D-product peaks.

## 4 References

1. Panter, F.; Krug, D.; Baumann, S.; Müller, R. Self-resistance guided genome mining uncovers new topoisomerase inhibitors from myxobacteria. *Chem. Sci.* **2018**, *9*, 4898–4908, doi:10.1039/C8SC01325J.
2. Magrini, V.; Creighton, C.; Youderian, P. Site-specific recombination of temperate *Myxococcus xanthus* phage Mx8: genetic elements required for integration. *J. Bacteriol.* **1999**, *181*, 4050–4061, doi:10.1128/jb.181.13.4050-4061.1999.
